# Supplementary material for: Analysis of the characteristic patterns and risk factors impacting the severity of intraoperative hypothermia in neonates
Source: PeerJ. 2024 Dec 16;12:e18702. doi: 10.7717/peerj.18702 (PMC11657186; doi:10.7717/peerj.18702)
Supplement: Supplemental Information 1 [file peerj-12-18702-s001.xlsx]

## Sheet: data
										Intraoperative body temperature
gender(1:Male;2:Female)	gestational age(week）	gestational age group(1:premature;2:term infant)	surgical method(1:Open surgery;2:Endoscopic surgery;3:Others)	age(d)	weight(kg)	ASA	planned surgery(1:No;2:Yes)	Duration of anaesthesia(mins)	hypothermia(0:No;1:Yes)	0min	10mins	20mins	30mins	40mins	50mins	60mins	70mins	80mins	90mins	100mins	110mins	120mins	130mins	140mins	150mins	160mins	170mins	180mins	190mins	200mins	210mins	220mins	230mins	240mins	250mins	260mins	270mins	280mins	290mins	300mins	310mins	320mins	330mins	340mins	350mins	360mins	370mins	380mins	390mins
Male	23	premature	Others	12	0.59	Ⅳ	Yes	60	No	37	36.8	36.6	36.4	36.3	36.4	36.3
Female	28	premature	Open surgery	8	0.7	Ⅳ	Yes	110	Yes	36	35.5	35	34.5	34.2	33.9	33.8	33.6	33.5	33.4
Male	28	premature	Open surgery	7	0.7	Ⅱ	No	203	Yes	36.2	36	36	35.7	35.8	35.9	35.9	35.9	35.1	35.7	35.7	35.1	35.1	35.1	35.1	35	35.8	36.5
Female	26	premature	Others	19	0.9	Ⅲ	No	70	Yes	36.5							35.7
Female	27	premature	Open surgery	9	1.02	Ⅲ	Yes	127	Yes	36.5	36.4	36.3	36.2	36.1	36.1	36.3	36.1	35.6	35.3	35.3	35.4	35.5
Female	29	premature	Endoscopic surgery	5	1.02	Ⅳ	No	236	Yes	36	36.2	36.1	36.2	36	35.6	36	34.1	33.8	33.7	33.7	33.5	33.4	33.5	33.7	34.2	34.5	34.8	35.3	35.6	35.8	35.9	35.9	35.7	35.8	36	36
Male	26	premature	Open surgery	12	1.04	Ⅳ	Yes	200	Yes	36	35.8	35.3	35.1	35	35	35	35	35	35	35	35	35	35	35	35	35	35.1	35.3	35.4
Female	31	premature	Open surgery	3	1.05	Ⅳ	Yes	148	Yes	35.3	35.2	35.7	36	36	35.7	35.5	35.6	35.5	35.4	35.3	35.3	35.3	35.4	35.4	35.4
Male	32	premature	Open surgery	2	1.05	Ⅳ	Yes	169	Yes	36.5				35.9	35.5	35.3	35.3	35.2	35	35	35	35.1	34.5	34.5	34.6	34.6
Male	29	premature	Open surgery	16	1.08	Ⅲ	Yes	147	No	36.8	36.8	36.8	36.2	36.4	36.5	36.5	36.5	36.5	36.4	36.7	36.4	36.3	36.3	36.2	36.3
Female	34	premature	Open surgery	3	1.1	Ⅳ	Yes	249	Yes	35.7	35.7	35.7	35.7	36.1	36.1	36.1	36.1	36.4	36.4	36.4	36.4	36.3	36.3	36.2	36.2	33.2	33.2	33.1	33.1	33.1	33.1	33.2	33.3
Male	28	premature	Open surgery	19	1.13	Ⅲ	No	114	Yes	37.4	33.6	34.5	34.4	34.4	34.5	34.6	34.8	35.2	35.6	35.6
Male	30	premature	Open surgery	19	1.13	Ⅲ	No	105	Yes	37.4	33.6	34.5	34.4	34.4	34.5	34.6	34.8	35.2	35.6	35.6
Female	29	premature	Others	11	1.16	Ⅳ	No	108	No									36.1	36.2	36.4
Male	31	premature	Open surgery	9	1.18	Ⅲ	No	236	Yes	36.5										32.4
Male	30	premature	Open surgery	5	1.18	Ⅳ	Yes	144	Yes	35.9	35.9	35.7	35.6	35.5	35.6	35.6	35.7	35.6	35.2	35.3	35.3	35.4	35.5
Female	28	premature	Open surgery	15	1.2	Ⅲ	No	94	Yes	36.5	32.6	32.7	32.9	33.4	33.9	34.4	35	35.5
Male	28	premature	Open surgery	1	1.2	Ⅳ	Yes	154	Yes	36.6	36.3	36.5	36.7	36.7	36.6	36.6	36.5	36.4	35.9	35.6	35.4	35.4	35.7	36
Male	28	premature	Open surgery	6	1.25	Ⅲ	Yes	258	Yes	36.5	36.4	36.4	36.3	36	35.8	35.6	35.5	35.3	35.4	35.5	35.6	35.7	35.8	35.8	35.9	35.9	35.8	35.7	35.8	35.8	36	36.1	36.2	36.3	36.5
Female	27	premature	Others	16	1.26	Ⅳ	Yes	80	Yes	36.7		35	34.7	34.4	34.2	33.9	33.8	34
Male	28	premature	Open surgery	13	1.3	Ⅱ	No	102	Yes	36.7	32.1	36.7	33	33.5	34	34.5	35.1	35.8	36.3
Male	28	premature	Open surgery	19	1.3	Ⅲ	No	53	Yes	35.6	36	36.1	36.2		36
Male	30	premature	Others	9	1.3	Ⅳ	Yes	64	Yes	36	34.7	34.5	34.2	34.1	33.9	34
Female	32	premature	Open surgery	4	1.3	Ⅲ	Yes	115	Yes	36.7	36.7	36.5	36	35.7	35.8	35.6	35.8	35.8	35.6	35.7
Male	29	premature	Endoscopic surgery	5	1.32	Ⅲ	Yes	212	Yes	36	36	33.9	34.5	34.3	34.1	34.4	34.4	34.5	34.5	33.8	33.9	33.8	33.9	34.1	34.3	34.4	34.5	34.7	35.6	36.2
Male	33	premature	Open surgery	25	1.32	Ⅲ	No	242	Yes	36.1	35.9	35.8	35.6	35.2	35	34.9	34.9	35	34.7	34.8	34.8	34.8	35	35.1	35.1	35.1	35.2		33.6	34.4	32.5	33.7	33.3
Male	28	premature	Others	27	1.32	Ⅲ	Yes	64	Yes	36	35.8	35.8	35.9	35.9	36	36
Female	35	premature	Endoscopic surgery	15	1.37	Ⅲ	No	118	Yes	36.6	34.6	34.3	34.3	34.4	34.3	34.2	34	33.9	33.8	33.7
Female	33	premature	Endoscopic surgery	12	1.37	Ⅲ	No	214	Yes	36.5													34.5	34.5	34.6	34.6	34.4	34.4	34.3	34.4
Male	30	premature	Endoscopic surgery	6	1.4	Ⅲ	No	200	Yes	35.9	36	35.8	35.6	35.4	35.3	35.3	35.3	35.1	35	35	35.1	35.1	35.2	35.2	34.8	34.9	34.9	34.5	34
Female	32	premature	Open surgery	2	1.4	Ⅳ	Yes	85	Yes	36.3	36.1	35.9	35.6	35.3	35.2	35.3	35.4
Male	29	premature	Endoscopic surgery	2	1.4	Ⅲ	No	207	Yes	36	36	33.3	33.5		34.6	34.4	34.3	34.6	34.7	34.8	34.9	34.9	35	35.1	35.2	35.3	35.5	35.6	35.5	35.5
Female	31	premature	Endoscopic surgery	12	1.4	Ⅱ	Yes	115	Yes	36	35.3	35.4	35.3	35	35	35	34.8	34.7	34.5	33.8	34.1
Male	35	premature	Open surgery	6	1.45	Ⅲ	No	226	Yes	36.1		35.3	35.2	35.7	35.7	35.1	33.6	32.3	32.7	32.6	32.9	33.2	33.3	33.6	32.8	35.4	35.1	35.1	36.3	36.5	35.5
Male	29	premature	Open surgery	23	1.45	Ⅲ	No	68	Yes	35.9	35.9	35.9	36	36.1
Male	30	premature	Endoscopic surgery	14	1.46	Ⅲ	Yes	182	Yes	35.7	35.7	35.7	35.7	35.7	35.7	35.7	35.7	35.7	35.7	35.2	35.3	35.7	36	36	36	36.3
Male	33	premature	Endoscopic surgery	3	1.46	Ⅱ	No	260	Yes	36.5	35.8	35.8	35.8	35.7	35.7	35.7	35.6	35.5	35.3	35.2	35	35	35	35.1	35.1	35.1	35.1	35.1	35.1	35.1	35.1	35.1	35.2	35.2	35.2
Male	33	premature	Open surgery	11	1.47	Ⅲ	Yes	185	Yes	36.5					33.7	35.8	35.9	35.9	35.9	35.9	35.7	35.6	35.7	35.8	35.9	35.9	35.8	35.8
Male	33	premature	Open surgery	4	1.48	Ⅲ	Yes	210	No	36.1	36	36.1	36.1	36.3	36.1	36	36.1	36.1	36.3	36.1	36.4	36	36	36.1	36	36.3	36.5	36.7	36.8	36.9	36.5	36
Male	30	premature	Open surgery	18	1.49	Ⅱ	Yes	125	Yes	36.5	36.2	36.2	36.2	36.2	36.2	36.2	36.2	36.2	36.2	36.2	35.8
Male	32	premature	Endoscopic surgery	18	1.5	Ⅲ	No	181	Yes	36	36	35.9	35.8	35.8	35.8	35.9	35.9	36	36.1	36.2	36.2	36.2	36.2	36.2	36.1	36.2
Female	29	premature	Open surgery	1	1.5	Ⅲ	Yes	169	Yes	36	34	34.5	33.9	34	34	34.2	34.1	33.8	33.7	33.7	33.8	34	34.2	34.5	34.9	35.3
Male	33	premature	Open surgery	16	1.5	Ⅳ	Yes	228	Yes	36	36	36	36	36	36	36	36	36	36	36	36	36	36	36	36	36	36	36	35.4		35.6	35.8
Male	32	premature	Open surgery	10	1.51	Ⅳ	Yes	208	Yes	36.5		35.5	35.4	35.3	35.2	35	34.8	34.6	34.5	34.4	34.2	34.4	34.6	34.9	35.2	35.5	35.7	35.8	36	36.3
Male	31	premature	Open surgery	7	1.54	Ⅳ	Yes	199	Yes	36	35.5	35.2	35	35	35.2	35.3	35.3	35.3	35.5	35.8	36	36.1	36.3	36.3	36.3	36.4	36.5	36.6	36.5
Female	29	premature	Open surgery	21	1.55	Ⅳ	Yes	109	No	36.3	36.2	36.2	36.3	36.2	36.3	36.5	36.3	36.2	36.3
Female	33	premature	Open surgery	6	1.58	Ⅲ	Yes	172	Yes	36.4	35.6	35.7	35.8	36.1	36.8	36.9	36.4	36.1	35.9	35.8	35.9	36	36	36.1	36.2	36.2
Male	31	premature	Open surgery	3	1.59	Ⅲ	Yes	291	Yes	36.3		35.7	34.3	34.5	34.3	34.3	34.3	34.3	34.3	34.3	34.3	34.3	34.3	34.3	34.3	34.3	34.2	34.1	34.2	34.3	34.4	34.4	34.4	34.5	34.6	34.6	34.5	34.5
Female	35	premature	Endoscopic surgery	3	1.6	Ⅲ	No	225	Yes	36.2	36.1	36.3	36.3	36.4	36.3	36.2	36.3	36.3	36.2	36.2	36.2	36.1	36.1	36	36	35.9	35.9	35.8	35.8	35.8	35	35.1
Male	36	premature	Others	11	1.6	Ⅲ	No	93	No		36.7	36.6	36.6	36.6	36.7	36.9	37.1	37.3
Male	28	premature	Open surgery	20	1.6	Ⅲ	Yes	140	Yes	37	37	36.8	36.1	36	36	36.8	36.6	35.6	35.5	35.6	35.6	35.6	35.7	35.8
Male	32	premature	Open surgery	2	1.6	Ⅲ	No	89	Yes	36.2						35.7	35.9	36	36.1
Female	28	premature	Others	19	1.6	Ⅳ	Yes	70	Yes	36.2	35.8	34.7	34.4	34.7	35.2	35	35.3	35.9	36.2
Female	30	premature	Open surgery	15	1.65	Ⅳ	Yes	267	Yes	36.2	36.2	36.2	36.2	36.2	36	35.7	35.4	35.1	36.7	36	36	36	36	36	36	36	33.7	33.5	34.2	34.2	33.3	33	33.6	33.9		34.6
Female	32	premature	Open surgery	5	1.66	Ⅱ	No	207	Yes	36	36	36	36	36	36	36	36	36	36	36	36	36	36	34.2	34.4	34.7	34.8	34.9	35
Male	32	premature	Endoscopic surgery	7	1.67	Ⅲ	No	247	Yes	36.5			33.3	33.2	36.5	36.5	32.6	32.6	32.6	32.6	32.4	32.3	32.2	32.5	32.6	32.9	33	32.9	33.1	33.4	33.7	33.8	34.1	34.3	34.3	35.3	35.6
Male	33	premature	Open surgery	17	1.68	Ⅲ	Yes	187	Yes	36	36	35.8	35.8	35.9	35.8	35.8	35.9	35.6	35.5	35.6	35.5	35.3	35.5	34.4	34.5	34.6	34.6	34.8	34.8	34.8	34.9
Male	33	premature	Endoscopic surgery	2	1.69	Ⅲ	No	134	Yes	36	36	36	36	36	35.8	35.8	35.9	35.8	35.8	35.9	35.8	35.7	35.9	36.2	36.4	36.7	36.5	36.4
Male	33	premature	Endoscopic surgery	3	1.7	Ⅲ	No	224	No					36.7	36.7	36.8	36.8	36.7	36.7	36.7	36.7	36.7	36.7	36.8	37	37.1	37.2	37.1	37	36.8	36.6	36.7
Male	33	premature	Others	1	1.7	Ⅲ	No	93	Yes		36.7	36.6	35.5	35.2	36.6	36.5	36.4	36.4
Male	33	premature	Endoscopic surgery	7	1.7	Ⅱ	No	228	Yes	36.6					33.8	33.6	33.5	33.5	33.5	33.6	33.6	33.6	33.6	33.6	33.6	33.7	33.9	34.1	34.3	34.5	34.8	35.3
Male	34	premature	Open surgery	8	1.7	Ⅳ	Yes	114	Yes	36.1	36.1	36.1	35.8	35.5	35.3	35.1	35.1	35	35	35.1
Male	36	premature	Open surgery	12	1.7	Ⅲ	Yes	115	No	36.3	36.1	36.5	36.1	36.1	36.6	36.1	36.1	36.1	36.7	36.3	36.2
Female	33	premature	Endoscopic surgery	1	1.7	Ⅲ	Yes	271	Yes	35.1	35	35	35	34.6	34.5	34.2	35.1	34.9	34.8	34	34.1	34.2	34.3	34.4	34.5	34.5	34.6	34.8	34.9	35	35.1	35.1	35.2	35.2	35.2	35.3
Female	33	premature	Open surgery	10	1.7	Ⅲ	No	136	Yes	36.2	35.5	35.4	35.2	35.1	35.1	35.1	35	35	35	34.9	34.9	34.9
Female	33	premature	Open surgery	11	1.7	Ⅲ	Yes	115	No			36.7	36.7	36.7	36.7	36.7	36.7	36.7	36.7	36.7	36.8
Male	36	premature	Open surgery	20	1.72	Ⅱ	Yes	182	Yes	36.5	36.5	36.5	36.5	36.5	36.5	36.3	32.8	33.6	34.5	34.4	34.2	34.3	35.5	36.5	33.4
Female	32	premature	Open surgery	14	1.72	Ⅲ	No	164	Yes	36.2	36.1	36	35.8	35.6	35.5	35.6	35.5	35.5	35.5	35.4	35.5	35.5	35.4	35.3	35.3	35.4
Female	32	premature	Open surgery	8	1.74	Ⅳ	Yes	149	Yes	36.5				35.5	35.6	35.5	35.5	35.5	35.3	35.3	35.4	35.4	35.5
Female	35	premature	Endoscopic surgery	1	1.75	Ⅲ	No	254	Yes	36			35.7	35.7	35.6	33.4	35.4	35.5	35.4	35.4	35.3	34	35.2	35.2	35.3	35.3	35.4	35.4	35.5	35.5	35.6	35.6	35.6	35.6
Male	33	premature	Others	1	1.77	Ⅳ	No	61	No	36.2	36.9	36	36.2	36.3	36.5	36.4
Female	34	premature	Open surgery	18	1.8	Ⅳ	Yes	146	No	36.4	36.3	36.4	36.3	36.3	36.2	36.3	36.1	36.1	36.2	36.2	36.2	36.2
Male	34	premature	Endoscopic surgery	3	1.8	Ⅲ	No	235	No	36.2	36.1	36.1	36.1	36.1	36.1	36.1	36.1	36.1	36.1	36.5	36.4	36.4	36.5	36.4	36.3	36.3	36.4	36.4	36.4	36.2	36.2
Female	35	premature	Endoscopic surgery	4	1.8	Ⅲ	No	238	Yes	35.5	35.3	34.8	34.7	34.3	34.1	34.8	34.3	34.4	34.5	34.4	35.8	36.2	36.3	36.4	36.4	36.5	37.7	38.2	38.1	35.3	34.6
Male	34	premature	Open surgery	1	1.81	Ⅳ	No	210	Yes	35.9																			35.9
Male	32	premature	Open surgery	1	1.82	Ⅳ	Yes	218	Yes	36.5					34.2	34.4	34.3	34.3	34.2	34	33.8	33.6	33.4	33.3	33.3	33.5	33.8	33.9	35.4	36.2
Female	33	premature	Endoscopic surgery	6	1.82	Ⅲ	No	158	Yes	36.2	35.2	35	34.8	34.7	34.6	34.5	34.4	34.2	34.1	34	33.9	33.6	33.6	34.2	34
Male	33	premature	Endoscopic surgery	4	1.89	Ⅳ	No	290	Yes	36.1	35.7	35.7	35.7	35.7	35.7	35.7	35.7	35.7	35.7	35.7	35.7	35.7	35.7	35.7	35.7			35.2	35.6	35.6	36.2	36.2	36.2	36.2	36.2	36.2	36.2	36.2	36.1
Male	36	premature	Open surgery	2	1.89	Ⅲ	Yes	105	No			36.1		36.3		36.5		36.6	36.6
Male	29	premature	Open surgery	23	1.9	Ⅳ	Yes	288	Yes	35.6	35.6	35.6	35.7	35.7	35.4	35.8	35.7	35.6	35.7	35.7	35.7	35.6	35.6	35.7	35.6	35.6	35.5	35.6	35.5	35.5	35.4	35.5	35.5	35.7	35.6	34.3	34.6	35.9
Male	36	premature	Endoscopic surgery	1	1.9	Ⅱ	No	160	Yes	36.2	35	34.5	36.2	35	36.2	36.2	32.9	33.1	33.3	33.4	33.6	33.7	33.9		34.5	34.9
Male	34	premature	Others	5	1.9	Ⅱ	No	103	Yes	36.5	36.5	36.5	36.5	36.5	36.3	36.1	35.8	35.7	36.2	35.9
Female	37	term infant	Open surgery	2	1.9	Ⅲ	Yes	60	Yes	35.9	35.5	35.8	35.5	35.7	35.7	35.6	35.4	35.6	35.5	35.7	35.8	35.9
Female	36	premature	Endoscopic surgery	2	1.9	Ⅳ	No	193	No	36	36	36	36	36	36.5	36	36	36	36	36	36.1	36.2	36.3	36.3	36.3	36	36	36.3	36.3	36.3
Female	33	premature	Others	14	1.9	Ⅲ	No	47	Yes	36.5				35.5	35.6	35.7	35.9
Male	38	term infant	Endoscopic surgery	9	1.92	Ⅲ	Yes	173	Yes	36		34.6	34.7	34.6	34.6	34.7	34.7	34.5	34.5	34.8	34.5	34.4	34.4	34.5	34.7	34.9
Female	38	term infant	Endoscopic surgery	3	1.92	Ⅳ	No	288	No	36.3						36.3						36.4						36.4						36.5
Female	36	premature	Endoscopic surgery	19	1.92	Ⅲ	No	168	Yes	36	36	36	36	36	35.9	35.9	35.9	35.9	35.9	35.9	35.9	36	35.8	35.7	35.8	35.7	35.7	35.9							36.3
Male	33	premature	Open surgery	1	1.93	Ⅲ	Yes	65	Yes	35	35	34.9	34.5	34.3	35.3	35.7	35.3
Male	33	premature	Open surgery	2	1.94	Ⅲ	Yes	168	Yes	36.6			36.3	36.4	36.4	36.3	36.2	36.1	36.3	36.3	35.9	35.8	35.7	35.9	35.9
Female	35	premature	Open surgery	4	1.96	Ⅲ	Yes	173	Yes	36.3	35.5	35.1	35.5	34.4	35.7			35.7	36.6	36.7	37.2	36.9	37.5	36.6	37	36.6
Female	35	premature	Open surgery	5	1.98	Ⅲ	No	135	Yes	36	35.6	35.4	35.3	35.3	35.4	35.1	35.4	35	35.1	35.2	35.2	35.2	35.1	35.2
Female	35	premature	Open surgery	5	1.98	Ⅲ	No	179	Yes	36.2		35.1	34.6	34.4	34.3	34.3	34.2	34.3	34.2	34.1	34.5	34.4	34.2	34.2	34.2
Male	34	premature	Open surgery	4	2	Ⅱ	Yes	146	No	36.6	36.8	36.5	36.4	36.5	36.4	36.3	36.4	36.4	36.4	36.5	36.5	36.6	36.7
Male	36	premature	Open surgery	1	2	Ⅲ	Yes	120	No	36.4	36.4	36.5	36.5	36.5	36.6	36.6	36.6	36.1	36.5	36.4	36.5
Male	33	premature	Others	1	2	Ⅲ	No	67	No	36.4	36.4	36.4	36.3	36.4	36.4
Female	39	term infant	Endoscopic surgery	3	2	Ⅲ	No	226	Yes	35.3	35.2	35.2	35.2	35.1		35.6	35.5	35.6	35.7	36	36	36.1	33.9	35.5	35.1	33.7	36	36.4	36.3	36.3	36.2	36.2
Male	33	premature	Endoscopic surgery	13	2	Ⅱ	Yes	162	No			36.8	36.2	36.2	36.2	36.2	36.2	36.2	36.2	36.2
Female	33	premature	Endoscopic surgery	3	2	Ⅲ	No	250	Yes	36	35.8	35.8	35.7	35.7	35.6	36.3	35	35	35.2	35.3	35.5	35.6	35.7	35.5	35.6	35.6	35.8		35.9	35.7	35.5	35.5	33.8	35.6	35.6
Male	28	premature	Open surgery	26	2	Ⅲ	Yes	159	Yes	36.2	35.9	35.6	35.6	35.6	35.6	35.6	35.6	35.6	35.6	35.6	35.6	35.4	35.4	35.4	35.4	35.4	35.5	35.8
Female	34	premature	Open surgery	4	2	Ⅲ	Yes	206	Yes	36.5	36.3	36	35.8	35.6	35.5	35.3	35	34.8	34.9	34.9	34.9	35	35.1	35.3	35.5	35.6	35.8	36	36.2
Female	36	premature	Open surgery	1	2	Ⅲ	No	117	No	36.5	36.5	36.6	36.5	36.5	36.4	36.5	36.5	36.3
Female	35	premature	Open surgery	16	2	Ⅲ	No	104	Yes	35	35.1	34.1	34.1	34.1	34.1	34.4	34.6	35	35.2
Male	37	term infant	Others	2	2	Ⅱ	No	50	Yes	36	35.9	35.7	35.8	35.7	35.7	36
Female	36	premature	Endoscopic surgery	2	2.01	Ⅲ	No	178	Yes	36.5	36.3	36.3	36.1	35.9	36	36	36	35.9	35.9	35.5	35.4	35.2	35.4	35.4	35.4	35.2	35.5
Male	30	premature	Open surgery	1	2.05	Ⅳ	Yes	153	Yes	36.1	36.1	36.1	36	36	35.8	35.3	35	34.9	35	35	35	35	35	35.3
Male	37	term infant	Endoscopic surgery	6	2.07	Ⅱ	No	132	No	36.8	36.1	36.2	36.2	36.3	36.5	36.2	36.6	36.8	36.3	36.3	36.5	36.8	36.7
Female	37	term infant	Open surgery	3	2.08	Ⅲ	No	230	Yes	35.9			35	34.8	35	35.2	35.3	35.5	35.5	35.6	35.6	35.7	35.7	35.8	35.8	35.9	36	36.1	36.2	36	36.1
Female	36	premature	Endoscopic surgery	12	2.1	Ⅲ	Yes	135	Yes	36.7	36.5	36.5	36.5	36.5	36.5	36.6	36.6	36.5	33.9	33.9	33.9	33.9	33.9
Male	32	premature	Open surgery	22	2.1	Ⅲ	No	99	No	36.5									36.5
Female	33	premature	Open surgery	1	2.1	Ⅱ	No	92	Yes	36.5	34.9	34.8	34.6	34.6	34.7	34.9	35.5	36
Female	37	term infant	Open surgery	1	2.12	Ⅲ	No	226	Yes	36				35.9	35.8	35.8	35.8	35.8	35.8	35.7	35.7	35.7	35.6	35.5	35.6	35.6	35.5	35.5	35.6	35.6	35.7	35.8	35.6	35.7
Male	32	premature	Open surgery	6	2.15	Ⅲ	No	40	Yes	35.8	35.8	35.8	36
Male	34	premature	Endoscopic surgery	3	2.16	Ⅲ	Yes	195	Yes	36.2						35.2	35.5	35.8	36	36.3	37	36.3	36.3	36.3	36.3	36.3	36.3	36.6	36.3
Female	35	premature	Others	5	2.17	Ⅲ	No	162	Yes	36.3			34.9	35	34.9	34.9	34.8	34.7	34.6	34.6	34.6	34.6
Male	36	premature	Endoscopic surgery	3	2.18	Ⅲ	Yes	295	Yes	36.3	35.3	35	34.7	34.7	34.6	34.7	34.7	34.7	35	35.1	35.3	35.5	35.6	35.6	35.3	34.9	34.9	34.1	33.5	33.6	33.7	33.7	33.6	33.8	33.8	33.5	33	33.7	33.9
Male	35	premature	Endoscopic surgery	3	2.2	Ⅲ	Yes	152	Yes	36		35.7	35.4	35.3	35.2	35.2	35.2	35.3	35.2	35.2	35.3	35.4	35.5	35.6	35.7
Male	33	premature	Open surgery	20	2.2	Ⅱ	No	99	Yes	36.5	34.5	34.7	34.9	35.1	35.5	35.7	36.1
Female	35	premature	Open surgery	2	2.2	Ⅲ	No	177	No								36.3	36.5	36.7	36.7	36.7	36.5	36.5	36.5	36.5	36.5	36.6
Female	35	premature	Open surgery	4	2.2	Ⅲ	No	130	Yes	36	34.7	34.4	34.3	34.4	34.4	34.3	34.3	34.2	34.3	34.6	34.9	35
Female	37	term infant	Endoscopic surgery	5	2.24	Ⅲ	Yes	76	Yes	36	36	35.1	35.3	35.7	35.9	36	36
Female	37	term infant	Endoscopic surgery	2	2.24	Ⅲ	Yes	192	Yes	36.5	35.7	35.8	35.7	35.8	35.8	35.6	35.5	33.8	33.4	33.2	32.9	32.9	33	33.2	33.5	33.6	33.4	34.5
Male	34	premature	Open surgery	1	2.24	Ⅲ	Yes	176	Yes	35.5	35.3	35.2	35.2	35.2	35.2	35.1	35.1	35.2	35.2	35.2	35.2	35.2	35.2	35.2
Male	36	premature	Open surgery	2	2.26	Ⅲ	Yes	162	Yes	36	35.8	35	34.5	34.1	34.1	34.1	34.1	34	34	34.1	34.1	34.1	34.1	34.6	35	36
Male	36	premature	Open surgery	25	2.29	Ⅲ	No	125	No					36.4	36.3	36.2	36.1	36.1	36.1	36
Female	38	term infant	Endoscopic surgery	10	2.3	Ⅲ	No	174	Yes	36.3	36.3	36	36.1	35.9	36	36.2	36.5	36.8	36.9	36.8	36.7	36.5	36.4	36.5	36.2	36.2	36.1	36.1	36.1	36
Male	38	term infant	Endoscopic surgery	2	2.3	Ⅲ	No	265	Yes	36	36	36	36	36	36	36	35.2	35.6	34	33.8	34	34.1	34.2	34.4	34.3	34.4	34.3	34.3	34.3	34.2	34.3	34.2	34.3	34.9	33.9
Male	36	premature	Others	2	2.31	Ⅲ	No	100	Yes	36.1	35.5	35.2	35.1	35.1	35.2	35.2	35.3	35.4	35.8
Female	37	term infant	Endoscopic surgery	1	2.31	Ⅲ	No	108	No	36.3	36.2	36.1	36	36.3	36.5	36.4	36.5	36.3	36.2	36.2	36.2
Male	33	premature	Open surgery	1	2.32	Ⅲ	Yes	170	Yes	36.3	36.5	36.8	36.7	36.8	36.4	36.8	36.5	36.8	36.8	36.6	36.8	36.7	36.8	36.2	36.4	36.7	36.9	35
Male	33	premature	Open surgery	26	2.33	Ⅳ	Yes	150	Yes	35	35	35	35	35	35	35.2	35.1	35	34.9	35	35	35	35	35	35
Female	37	term infant	Others	2	2.34	Ⅱ	No	143	Yes	36	35.8	35.8	35.7		35.7	35.7	35.8	35.8	35.8	35.8	35.8	35.9	36	36
Male	37	term infant	Open surgery	1	2.35	Ⅲ	No	138	Yes	36.2	36.2	35.2	35.1	35	35	35	35.1	35.2	35.3	35.4	35.6	35.6
Male	34	premature	Endoscopic surgery	2	2.35	Ⅱ	No	154	Yes	35.1	35.3	34.9	34.9	34.9	34.9	34.9	34.8	34.8	34.8	34.9	35	34.9	35.1	35.2
Female	36	premature	Others	9	2.35	Ⅲ	No	125	Yes	36.5	36.3	36	35.7	35.3	35.3	35.2	35.1	35.2	35.4	35.7	36
Female	35	premature	Others	13	2.35	Ⅲ	No	66	Yes	36.2	35.9	35.7	35	35.9	35.9	35.9
Female	38	term infant	Endoscopic surgery	4	2.38	Ⅲ	No	194	Yes	36.3				34.8	35.1	35	35	35.1	35.2	35.2	35.2	35.3	35.4	35.5	35.5	35.6
Male	39	term infant	Endoscopic surgery	7	2.38	Ⅱ	No	80	No	36	36.1	36.2	36.2	36.1	36.1	36.1	36.1
Male	32	premature	Open surgery	1	2.4	Ⅲ	No	80	Yes	36.3	35.7	35.5	35.3	35.3	35.2	35.2	35.2
Female	37	term infant	Others	6	2.4	Ⅱ	No	154	Yes	36.2	33	36.3	36.2	36.2	36.1	35.9	35.8	35.9	35.9	35.9	35.9	35.9	36	36.1
Female	36	premature	Endoscopic surgery	2	2.4	Ⅲ	No	276	Yes	35.1	35.3	35.7	36.2	35.1	35.3	35.4	35.5	35.1	35.2	35.2	35.2	35.2	35.5	35.7	36.5	35.8	36.3	36.3	36.3	36.3	36.3	36.3	36.3	36.3	36.3	36.3
Male	37	term infant	Endoscopic surgery	2	2.4	Ⅲ	Yes	221	Yes	36.5					35	35.3	35.4	35.4	35.4	35.5	35.5	35.6	35.5	35.3	35.2	34.9	34.8	34.9	35	35.2	35.3
Male	39	term infant	Endoscopic surgery	3	2.4	Ⅲ	Yes	241	Yes	36.5	36.4	36.4	36.4	36.4	36.5	35.5	35.5	35.5	35.2	35.3	35.4	35.5	35.6	35.7	35.7	35.8	35.9	35.5	35.8	35.9	35.8	35.8
Female	33	premature	Others	19	2.4	Ⅳ	No	250	Yes	35.7	35.6	35.6	35.5	35.4	35.4	35.4	35.4	35.4	35.2	35.2	35.3	35.2	35.2	35.3	35.3	35.4	35.7	35.7	35.7	35.5	35.6	35.6	35.6	35.7	35.6	35.3	36
Female	39	term infant	Endoscopic surgery	8	2.4	Ⅱ	Yes	220	Yes	36.7	36.3	36.2	36.5	36.5	36	35.9	35.6	35.5	35.3	36	36.1	36.2	36.3	36.3	36.4	36.4	36.5	36.4	36.5	34.3	34.4
Female	39	term infant	Endoscopic surgery	8	2.4	Ⅱ	Yes	220	Yes	36.7	36.3	36.2	36.5	36.5	36	35.9	35.6	35.5	35.3	36	36.1	36.2	36.3	36.3	36.4	36.4	36.5	36.4	36.5	34.3	34.4
Male	36	premature	Others	10	2.4	Ⅲ	No	162	Yes	36.5	36.5	36.5	36.5	36.1	36.1	36.1	36.1	36.1	36.1	36.1	36.1	35.6	35.6	35.7	36.2	36.2
Female	36	premature	Others	8	2.4	Ⅲ	Yes	89	Yes	35.9	35.9	35.9	35.7	35.6	35.7	35.9	36
Male	35	premature	Endoscopic surgery	4	2.4	Ⅲ	Yes	94	No	36.3	36.3	36.2	36.2	36.2	36.2	36.2	36.2	36.2	36.2
Female	37	term infant	Others	17	2.4	Ⅱ	No	15	No	37.3	37	36.8	36.8	36.8	36.8
Female	38	term infant	Others	12	2.4	Ⅲ	No	210	Yes	36.5											35.1	35.1	35.1	35.1	35.1	35.1	35.2	35.3	35.4	35.3
Male	37	term infant	Open surgery	8	2.4	Ⅱ	No	56	Yes	35.5	36.2	36.2	36.2	36.2	36.2
Female	38	term infant	Open surgery	5	2.4	Ⅲ	No	150	Yes	36.5	34.6	34.8	34.8	34.5	34.7	34.8	34.9	34.7	34.6	34.7	34.8	35	35.1
Female	37	term infant	Open surgery	2	2.4	Ⅱ	No	60	No	36.3	36.3	36.4	36.3	36.2	36.2
Male	36	premature	Open surgery	4	2.41	Ⅲ	Yes	245	Yes	37.1								34.7	34.9	35	35	35	35.1	35.1	35	34.8	34.8	34.7	33.6	34.2	33.5	33.9	33.9	34
Female	35	premature	Open surgery	4	2.41	Ⅱ	No	166	Yes	36.7	36.5	36.4	36.3	36.1	35.7	35.5	35.5	35.5	35.4	35.4	35.4	35.4	35.4	35.5	35.8	36
Male	38	term infant	Endoscopic surgery	4	2.42	Ⅲ	No	314	Yes	36.5	36.2	36	35.8	35.6	35.6	35.5	35.6	35.6	35.7	35.8	35.9	36	36.1	36.2	36.4	36.5	36.7	36.7	36.6	36.4	36.3	36.4	36.5	36.8	36.9	36.8	36.8	36.9
Male	37	term infant	Open surgery	8	2.45	Ⅱ	Yes	132	Yes	36.6	36.1	35.8	35.7	35.7	35.7	35.7	35.7	35.7	35.6	35.6	35.6	35.6	35.7
Male	39	term infant	Others	2	2.47	Ⅲ	No	119	Yes	36.6	35.6	36.6	36.4	36.3	36.2	35.9	35.8	35.8	35.8	35.8	35.8
Female	34	premature	Open surgery	1	2.47	Ⅲ	No	219	Yes	36.2	36	35.8	35.5	35.3	35	34.8	34.6	34.6	34.5	34.6	34.6	34.8	35	35.1	35.2	35.4	35.6	35.6	35.8	35.9	35.8
Male	39	term infant	Endoscopic surgery	5	2.48	Ⅲ	No	216	Yes	36	36	36	35.8	35.8	35.7	35.5	35.7	35.9	36	36.2	36.3	36.4	36.5	36.7	36.6	36.6	36.6	36.4	36.4	36.5
Male	39	term infant	Open surgery	18	2.49	Ⅲ	Yes	69	Yes	36.5	36.2	35.9	35.9	35.9	35.9	35.9
Female	38	term infant	Endoscopic surgery	2	2.5	Ⅲ	No	190	Yes	36	35.8	35.8	35.9	35.9	35.9	36	36.1	36	36	36	36	36	36	36	36	36	36	32.9
Male	39	term infant	Others	7	2.5	Ⅲ	No	108	Yes	35.5	35.9	35.9	35.9	35.9	35.8	35.7	35.7	35.7	35.7	35.7
Female	38	term infant	Endoscopic surgery	27	2.5	Ⅲ	Yes	63	Yes	36.3	35.5	35.2	35.5	35.8	35.7
Male	35	premature	Endoscopic surgery	1	2.5	Ⅲ	No	106	Yes	35.5	35.2	35.1	34.9	34.9	34.9	35	35	35.2	35.3
Male	36	premature	Open surgery	1	2.5	Ⅲ	Yes	149	Yes	36.5		35.9	35.7	35.9	36	36.1	36.2	36.1	36.3	36.2	36.2	36.4	36.6	36.9	36.5
Male	38	term infant	Endoscopic surgery	2	2.5	Ⅲ	No	350	Yes	36.5	36.5	36.5	36.2	36.5	36.5	36.5	36.5	36.5	36.4	36.4	36.4	36.5	36.6	36.5	36.5	36.5	36.5	36.4	36.5	35.9	35.8	35.8	35.8	35.7	35.9	35.8	35	35.2
Female	38	term infant	Endoscopic surgery	3	2.5	Ⅱ	No	81	No	36.4	36.7	36.8	36.1	36.1	36.3	36.2	36.2	36.1
Female	36	premature	Endoscopic surgery	3	2.5	Ⅱ	Yes	149	Yes	36.2	36	35.9	35.9	35.8	35.9	35.9	36	35.9	35.8	35.9	35.9	35.9	36	36.1
Male	37	term infant	Endoscopic surgery	11	2.5	Ⅲ	Yes	193	No		36.5	36.5	36.5	36.5	36.5	36.5	36.5	36.5	36.5	36.5	36.5	36.1	36.1	36.2	36.3	36.4	36.5	36.6
Male	37	term infant	Endoscopic surgery	2	2.5	Ⅲ	No	110	Yes	35.5	35.3	35	35.1	35.3	35.4	35.7	35.9	36.1	36.3	36.3
Female	35	premature	Endoscopic surgery	2	2.5	Ⅲ	No	209	Yes	36.2	36.2	36.2	36.3	36.2	36.2	36.2	36.2	35.9	36	36.2	36.2	36.2	36.2	36.2	36.1	36.2	36.2	36.2	36.2	36.2
Female	38	term infant	Endoscopic surgery	10	2.52	Ⅲ	No	289	Yes	36.5		36.3	36.1	36	35.9	35.8	35.7	35.7	35.6	35.6	35.6	35.6	35.5	35.5	35.4	35.4	35.2	35.2	35.3	35.5	35.6	35.7	35.7	35.7	35.8	35.9	35.9	35.9
Male	38	term infant	Endoscopic surgery	1	2.53	Ⅲ	No	222	No	36.7	36.2	36.2	36.2	36.2	36	36.1	36.1	36.3	36.3	36.1	36.1	36.1	36.2	36.2	36.2	36.2	36.1	36.1	36.1
Female	38	term infant	Endoscopic surgery	1	2.55	Ⅲ	Yes	185	Yes	36.1	36.1	36.1	36	35.8	35.6	35.3	35	34.7	34.8	34.6	34.6	34.5	34.5	34.5	34.4	34.4	34.5	34.6	34.7
Female	35	premature	Open surgery	3	2.55	Ⅲ	Yes	185	Yes	35.8	35.8	35.8	35.9	36	36.1	35.9	35.9	35.8	35.7	35.7	35.8	35.8	36	36	36	36	36	36	36
Male	38	term infant	Endoscopic surgery	9	2.57	Ⅱ	No	354	Yes	36	36	36	35.3	35.1	34.9	34.8	34.7	34.7	34.7	34.7	34.8	34.8	34.8	34.8	34.8	34.8	34.8	34.8	34.8	34.8	34.8	34.8	34.7	34.7	34.5	34.2	34.2	34
Male	37	term infant	Others	7	2.57	Ⅱ	No	71	Yes	35.2	35.1	35.2	35.4	35.5	35.6
Female	39	term infant	Endoscopic surgery	4	2.57	Ⅲ	No	165	Yes	36.2	35.9	35.8	36.5	36.7	36.6	36.8	36.8	36.8	36.8	36.8	36.8	36.8	36.8	36.8	36.8	36.8	36.4
Female	39	term infant	Endoscopic surgery	9	2.57	Ⅲ	No	249	Yes	36.1	36.1	36.1	36.1	36.1	36.1	36.1	36.1	36.1	36.1	36.1	36.1	36.1	36.1	36.1	36.1	36.1	36.2	35.3	35.3	35.4	35.4	35.5
Male	36	premature	Open surgery	10	2.58	Ⅲ	No	194	Yes	36.3	36.2	36.1	36	35.9	35.8	35.6	35.7	35.6	35.5	35.5	35.4	35.5	35.7	35.8	36	36.2	36.3	36.4
Male	40	term infant	Open surgery	2	2.6	Ⅲ	Yes	85	Yes	35.8	35.8	35.8	35.8	35.7	35.8	35.8
Female	36	premature	Endoscopic surgery	1	2.6	Ⅲ	No	215	Yes	36												35.5							34.8	34.8	34.9	34.9
Female	37	term infant	Open surgery	3	2.6	Ⅱ	No	408	Yes	36.2	36.2	36.2	36.2	36.2	36.2	36.3	36.2	36.2	36.2	36.3	36.2	36.2	36.2	36.2	36.2	36.2	36.2	36.2	36.2	36.2	36.2	36.2	36.2	35.7	35.9	36.1	36.3	36.4	36.3	36.5
Male	35	premature	Others	23	2.6	Ⅱ	No	240	Yes	36.8						35.7	35.6	35.6	35.4	35.2	35.1	34.9	34.7	34.7	35	35.3	35.7	35.9	36.1	36.2	36.1	35.9	36.1	36.4	36.6	36.6	36.6	36.5	36.4
Male	37	term infant	Others	1	2.6	Ⅲ	No	79	Yes	36	35.5	35.5	35.4	35.4	35.4	35.4	35.4
Female	35	premature	Others	24	2.6	Ⅳ	Yes	89	No		36.2	36.4	36.2	36.2	36.2	36.1	36.2
Female	37	term infant	Open surgery	13	2.6	Ⅲ	No	180	Yes	36.8	35.4	34.6	34.8	35.1	35.4	35.7	35.8	35.8	35.8	35.7	35.7	35.7	35.6	35.9	36	36.2	36.4
Male	36	premature	Open surgery	1	2.6	Ⅲ	Yes	110	Yes	36.3	36	35.9	35.7	35.6	35.6	35.5	35.5	35.5	35.5	35.6
Female	32	premature	Open surgery	2	2.6	Ⅳ	No	176	Yes	35.7	35.5	35.4	35.3	34.9	34.9	35.4	35.3	35.6	35.7	35.9	36.1	36.4	36.7	36.7	36.3
Female	39	term infant	Open surgery	3	2.6	Ⅲ	No	191	No	36	36	36.2	36.2	36	36	36	36	36	36.1	36	36.1	36	36.3	36.3	36.2	36.2	36.1	36	36
Female	35	premature	Endoscopic surgery	1	2.6	Ⅲ	Yes	150	Yes	36.1	36.2	35.9	35.9	36	35.9	35.9	35.8	35.9	35.9	35.9	35.9	35.9	36	36	36
Female	39	term infant	Open surgery	2	2.6	Ⅱ	No	185	Yes	36.2	36.2	36.2	36.2	36.2	36.2	36.2	36.1	36.2	36.2	36.2	36.2	36.2	36.2	36	35.8	35.9	36
Male	37	term infant	Endoscopic surgery	1	2.6	Ⅲ	Yes	264	Yes	35.8	35.7	36	36	36	36	36	36	36	36	36	36	36	36	36	36	36	36	36	36	36	36	36	36	36	36	35.7	36.1	35.4
Male	39	term infant	Endoscopic surgery	9	2.6	Ⅱ	Yes	113	Yes	36.5		35.5	35.3	35.2	35.3	35.4	35.5	35.5	35.6	36
Male	37	term infant	Open surgery	10	2.61	Ⅱ	No	236	Yes	36		36	35.8	35.8	35.6	35.6	35.5	35.5	35.4	35	35	34.8	34	34.3	34.7	34.9	34.9	35.1	35.2	35.2	35.1	35.3	35.4
Female	40	term infant	Endoscopic surgery	5	2.62	Ⅲ	No	126	Yes	36.3	35.3	35.3	35.3	35.4	35.7	35.9	36.2	36.3	36.4	36.7
Male	40	term infant	Endoscopic surgery	7	2.62	Ⅱ	No	131	Yes	35.1	34.9	34.7	34.7	34.6	34.6	34.6	34.6	34.8	34.9	34.8	35	35.7
Female	35	premature	Endoscopic surgery	1	2.63	Ⅲ	Yes	123	Yes	35.7	35.5	35.7	35.5	35.5	35.6	35.6	35.6	35.6	35.6	35.6
Male	36	premature	Open surgery	5	2.65	Ⅲ	No	216	Yes	36		35.8	35.7	35.7	35.6	35.4	35.4	35.2	35.2	35.1	35.1	35.2	35.2	35.4	35.4	35.4	35.5	35.6	35.7	35.9
Male	37	term infant	Others	7	2.65	Ⅱ	No	187	Yes	36.2				34.9	34.6	34.5	34.5	34.6	34.6	34.7	34.7	34.8	34.8	34.9	34.9	35	35	34.8
Male	38	term infant	Endoscopic surgery	9	2.65	Ⅱ	No	239	Yes	36.6		36.3	35.6	35.5	35.7	35.8	36	36.2	36.3	36.5	36.6	36.7	36.9	37	37.1	37.1	37.1	37.1	37.1	37.2	37.2	37.1
Female	40	term infant	Others	13	2.65	Ⅲ	No	181	Yes			35.8	35.9	35.9	35.9	35.9	35.9	35.9	35.9	35.9	35.9	35.9	36.1	36.2	36.4	36.6	36.8
Female	35	premature	Open surgery	2	2.65	Ⅲ	Yes	214	Yes	36.5												34.4	34.4	34.5	34.4	34.5	34.5	34.8	35.2	35.3
Female	40	term infant	Endoscopic surgery	6	2.65	Ⅲ	Yes	172	Yes	36.3	34.8	34.6	34.6	34.5	34.5	34.7	34.9	35.1	35.2	35.4	35.6	35.7	35.9	36	36	36.3
Male	34	premature	Open surgery	3	2.66	Ⅲ	Yes	138	No	36.5	36.4	36.3	36.2	36.2	36.2	36.2	36.5	36.6	36.7	36.7	36.7	36.7	36.7	36.6
Female	37	term infant	Endoscopic surgery	2	2.67	Ⅱ	No	235	Yes	36	35.8	35.6	35.6	35.2	35	35	34.8	35.1	35.3	35.6	35.8	35.9	36	36.1	36.3	36.5	36.6	36.6	36.5	36.5	36.6
Female	40	term infant	Endoscopic surgery	10	2.68	Ⅱ	Yes	135	Yes	36.5	36.2	36	35.7	35.8	35.9	36.2	36.1	35.7	35.4	35.9	36.1	36.1	36.2	36.2
Male	38	term infant	Open surgery	1	2.7	Ⅲ	Yes	270	Yes	36				35.3	35.2	34.7	34.6	34.7	34.7	34.8	34.9	35.1	35.2	35.2	35.3	35.3	35.1	35.1	35.1	35	34.9	35.2	35.8	35.8	33.7	34.4
Male	34	premature	Open surgery	1	2.7	Ⅲ	Yes	183	Yes	36.5	36.4	36.2	36	35.9	35.8	35.7	35.7	35.6	35.7	35.8	35.9	35.9	36	36.1	36.1
Male	36	premature	Others	1	2.7	Ⅲ	Yes	42	Yes	35.6	35.5	35.5
Female	39	term infant	Others	8	2.7	Ⅱ	No	327	Yes	36.5								35.4	35.7	36	36.3	36.6	36.8	37	37.1	37.2	37	36.9	36.8	36.7	36.6	36.5	36.4	36.3	36.3	36.3	36.3
Male	37	term infant	Open surgery	2	2.7	Ⅲ	No	198	Yes	35.1	35.1	35.1	35.1	35.3	35.6	35	35.7	35.8	35.9	35.9	35.9	36	36.1	36.3	36.5	36.6	36.3	36.2
Male	38	term infant	Others	5	2.7	Ⅲ	No	96	Yes	36.3	36.3	35.7	35.3	35.3	35.5	35.7	35.9	35.9	35.9
Female	38	term infant	Endoscopic surgery	1	2.7	Ⅱ	No	261	Yes	36.3	34.6	34.7	34.4	34.2	33.7	33.6	33.9	34.2	34.4	34.5	34.5	34.6	34.6	34.6	34.6	34.5	34.4	34.2	34.1	34.1	34.1	34.2	34.1	34.1	34.2
Male	39	term infant	Open surgery	27	2.7	Ⅲ	No	250	Yes	36.2	36.2	36.2	36.2	36.2	36.2	36.2	35.2	35.5	35.9	36.1	36.3	36.5	36.7	36.8	36.8	36.9	36.9	36.9	37.1	37.2	37.1	36.8	36.8	36.9	37
Male	37	term infant	Endoscopic surgery	1	2.7	Ⅲ	Yes	375	Yes	36.5							35.4	35.6	35.3	35.4	35	34.5	34.7			34.1	34.2	34.4	34.4	34.1	34.3	34.3	34.4	34.5	34.7	34.5	34.3	34.2
Female	39	term infant	Others	7	2.7	Ⅲ	No	184	No	36.4	36.3	36.3	36.2	36.2	36.3	36.3	36.3	36.4	36.4	36.5	36.5	36.4	36.4	36.5	36.5	36.5	36.4	36.4
Female	38	term infant	Open surgery	2	2.7	Ⅲ	Yes	146	Yes	36.5	36.5	36.4	36.4	36.3	36.3	36.3	36.1	36	35.9	35.6	35.6	35.6	35.5	35.5	35.5	36.2
Female	40	term infant	Endoscopic surgery	5	2.7	Ⅲ	No	176	Yes	35.7	35.6	35.7	35.5	35.3	35.2	35.3	35.3	35.3	35.2	35.1	35.1	35.1	35.1	35.1	35	35	35.1
Male	38	term infant	Open surgery	3	2.7	Ⅲ	No	155	Yes	36.6	36	35.6	35.5	35.5	35.6	35.8	36	36.2	36.4	36.5	36.6	36.7	36.7	36.8
Male	38	term infant	Endoscopic surgery	19	2.7	Ⅲ	No	312	Yes	36.3	36.4	36.5	36.4	36.3	36.1	36.1	36	36.1	35.9	35.8	35.9	36	36	36.1	36.1	35.9	35.9	35.9	36	35.9	36.1	36.3	36.2	36.2
Male	38	term infant	Endoscopic surgery	3	2.7	Ⅲ	Yes	69	Yes	36.4	36	36.2	36.2	36.2	36.2	35.3
Male	36	premature	Endoscopic surgery	4	2.7	Ⅲ	Yes	318	Yes	36.3	36	35.7	35.5	35.3	35.4	35.1	34.6	34.3	34.4	34.6	34.7	34.8	35	35.1	35.3	35.5	34.6	35.6	35.8	35.9	36.1	36.2	36.3	36.3	36.3	36.4	36.4	36.3	36.3
Female	37	term infant	Endoscopic surgery	1	2.72	Ⅲ	No	84	No		36.1	36.1	36	36.1	36.1	36.2	36.4
Male	38	term infant	Others	2	2.72	Ⅲ	No	69	Yes	35.9	35.8	35.6	35.6	35.6	35.5	35.5
Male	37	term infant	Open surgery	3	2.73	Ⅱ	Yes	103	Yes	36	35.9	35.9	35.9	35.8	35.7	36.5	35.4	35.3	35.2	35.1
Female	38	term infant	Endoscopic surgery	12	2.73	Ⅱ	No	115	Yes	36.1	35.8	35.7	35.5	35.5	35.5	35.5	35.4	35.4	35.3	35.3
Male	38	term infant	Endoscopic surgery	1	2.74	Ⅱ	No	220	Yes							36.3	36.1	36	35.9	36	35.9	36	36.1	36.2	36.4	36.5	36.6	36.7	36.8	36.5	36.7
Female	39	term infant	Open surgery	1	2.74	Ⅲ	Yes	84	Yes	35.8	35.5	35.8	35.6	35.5	35.6	35.8	36
Female	33	premature	Open surgery	7	2.75	Ⅲ	Yes	114	Yes	36.5	36.5	36.2	36	35.8	35.6	35.5	35.5	35.4	35.3	35.4	35.4
Female	33	premature	Open surgery	19	2.75	Ⅲ	Yes	35	No	36.1	36.1	36.4	36.4	36.2
Female	39	term infant	Endoscopic surgery	3	2.75	Ⅲ	No	225	Yes	36	36	36	35.9	35.8	35.8	35.8	35.8	35.8	35.8	35.8	35.8	35.8	35.9	35.9	35.9	35.9	35.9	35.9	35.9	35.9	35.9	35.9
Male	38	term infant	Endoscopic surgery	2	2.75	Ⅲ	No	255	Yes	36	36	36	36	35.8	35.7	35.6	35.6	35.5	35.5	35.4	35.4	35.6	35.4	35.4	35.5	35.5	36	35.5	35.5	35.5	35.8	35.8	35.8	35.8	35.8
Female	37	term infant	Open surgery	9	2.75	Ⅳ	No	91	Yes	35.3	35.2	35	34.9	35	34.7	35.1	35.5
Male	36	premature	Open surgery	1	2.76	Ⅲ	No	75	No	36.4	36.3	36	36.1	36.1	36	36	36.1	36.2
Male	35	premature	Open surgery	7	2.76	Ⅲ	No	250	Yes	36.2	36.2	36.1	36.1	36	35.9	35.8	35.4	35	34.6	34.4	34.2	34.4	34.7	34.8	34.6	34.6	34.7	34.7	34.7	34.7	34.8	35.2	35.5	35.9
Male	40	term infant	Others	2	2.77	Ⅲ	No	80	No			36.4	36.4	36.3	36.4	36.5	36.3	36.5
Female	38	term infant	Endoscopic surgery	2	2.78	Ⅲ	No	59	Yes	36.5		35.3	35.4	35.6	35.9	36.6	36.7	37	37.2	37.5	37.9	37.9
Male	39	term infant	Endoscopic surgery	3	2.78	Ⅲ	No	240	Yes	36	35.8	36.2	36	36	36.1	36.1	36.2	36.2	36.1	36	35.4	35.5	35.6	35.7	35.8	35.9	36	36	36.1	36.2	36.3	36.2	36.2	36
Male	37	term infant	Open surgery	2	2.8	Ⅱ	Yes	54	Yes	36.3	36.3	35.9	35.7	35.6
Male	37	term infant	Others	1	2.8	Ⅰ	Yes	56	Yes	36.4	36.4	36.4	36.9	35.5	34.6
Male	39	term infant	Endoscopic surgery	1	2.8	Ⅱ	Yes	157	No	36.4	36.4	36.4	36.2	36.2	36.4	36.5	36.4	36.4	36.4	36.5	36.5	36.5	36.4	36.5
Male	35	premature	Endoscopic surgery	1	2.8	Ⅲ	Yes	217	Yes	35.8	35.6	35.7	35.8	36	36.1	36	36	36	36	36	36.1	36.1	35.7	35.8	35.8	35.8	35.8	35.8	35.9	35.7	35.8	35.2	35.1
Male	37	term infant	Open surgery	1	2.8	Ⅰ	Yes	56	Yes	36.4	36.4	36.4	36.9	35.5	34.6
Female	39	term infant	Endoscopic surgery	4	2.8	Ⅲ	No	359	Yes		36.1	35.9	35.9	35.7					34.5	31.4	31.1	31.3	31.4	31.3	31.3	33.6	36.7	36.6	36.5	36.4	36.4	36.4	36.4	36.4	36.4	36.4	36.4	36.4	36.4
Female	37	term infant	Endoscopic surgery	15	2.8	Ⅲ	No	106	Yes	36.5	36.3	36.2	36	35.8	35.5	35.3	35.1	35.1	35.1	35.3
Female	38	term infant	Open surgery	1	2.8	Ⅲ	Yes	183	Yes	36.2	36.1	35.6	35.5	35.2	35	34.9	34.9	34.9	34.8	34.8	34.8	34.9	35	35.1	35.1	35	36.1	36.1
Male	38	term infant	Endoscopic surgery	6	2.8	Ⅲ	Yes	240	Yes	36.2	36.3	36.1	36	35.9	36	36.1	36	36.1	36.2	36.1	36	36.2	36.3	36.2	36.1	36.2	36.1	36	31.9
Female	36	premature	Endoscopic surgery	2	2.8	Ⅲ	Yes	146	No	36.1	36.2	36.2	36.2	36	36.2	36	36.2	36	36.6	36.6	36.2	36.2	36.1	36.2	36
Male	37	term infant	Others	2	2.8	Ⅲ	No	204	Yes	36.3	36.2	35.7	35.2	34.8	34.7	34.6	34.4	34.4	34.4	34.5	34.5	34.6	34.5	34.5	34.5	34.2	34.3	34.4	34.9
Female	38	term infant	Endoscopic surgery	1	2.8	Ⅲ	No	113	Yes	36.6	35.3	35.1	35.1	35.1	35	35	35	35.3	35.3	35.3
Male	34	premature	Others	6	2.8	Ⅱ	No	166	Yes	35.5	35.5	35.5	35.5	35.3	35.4	35.4	35.3	35.2	35.2	35.1	35.2	35.4	35.3	35.3	35
Female	39	term infant	Endoscopic surgery	2	2.8	Ⅲ	No	143	Yes	36.2	36	36	35.9	35.9	35.9	35.7	35.6	35.5	35.5	35.6	35.6	35.8
Female	39	term infant	Open surgery	3	2.8	Ⅲ	Yes	207	Yes	36.1		35.3	35.1	35.1	35.3	35.4	35.3	35.4	35.6	35	35.6	35.8	35.9	35.9	35.8	35.9	36.1	36.2	36.3	36.5
Female	40	term infant	Open surgery	1	2.81	Ⅲ	No	88	Yes	36.5	36.4	36.3	36	35.9	35.9	36
Male	38	term infant	Others	2	2.82	Ⅲ	Yes	81	Yes	36.5	35.1	35.2	35	34.7	34.5	35.2	35.3
Female	38	term infant	Others	3	2.83	Ⅱ	No	190	Yes	36.5			35.4		35.2	35.2	35.2	35.2	35.4	35.6	35.8	35.9	35.9	36	36	36	36.3
Male	40	term infant	Open surgery	6	2.85	Ⅲ	No	153	Yes	36.5	34.9	35.1	35.3	35.4	35.5	35.5	35.3	35.2	35	35.2	35.4	35.7	36	36
Male	39	term infant	Open surgery	5	2.85	Ⅲ	Yes	154	Yes	36.2	36.1	36.1	36.1	36.1	36	35.6	35.6	35.2		35.5		35.4	35.3	35.2
Male	40	term infant	Others	3	2.85	Ⅱ	No	57	Yes	36.5		35.9	35.7	35.7	35.6	35.4
Male	36	premature	Endoscopic surgery	9	2.87	Ⅲ	Yes	74	Yes	36	35.7	35.7	35.7	35.7	35.7	35.8	35.8
Male	39	term infant	Open surgery	10	2.88	Ⅱ	Yes	143	Yes	36.2	36	35.8	35.6	35.4	35.3	35.3	35.3	35.3	35.1	35	34.9	34.8	34.9	34.9
Female	36	premature	Endoscopic surgery	1	2.88	Ⅲ	Yes	250	No						36.6	36.5	36.5	36.5	36.6	36.5	36.3	36.1	36.1	36.1	36.2	36.3	36.5	36.6	36.7	36.6	36.4	36.6	36.9	37.3	37.7
Female	37	term infant	Endoscopic surgery	3	2.88	Ⅳ	No	254	No				36.5	36.5	36.4	36.4	36.3	36.3	36.3	36.3	36.3	36.4	36.6	36.7	36.6	36.5	36.5	36.6	36.6	36.6	36.6	36.5
Male	38	term infant	Open surgery	2	2.89	Ⅲ	Yes	50	Yes	36.2		35.9	36	35.9	35.8
Female	40	term infant	Open surgery	14	2.9	Ⅲ	No	190	Yes	36.5							35	34.9	35.1	35.2	35.4	35.5	35.6	35.8	36.1	36.3	36.6
Male	38	term infant	Open surgery	2	2.9	Ⅱ	No	287	Yes	36.5		36	36	35.9	35.7	35.7	35.7	35.7	35.7	35.8	35.8	35.7	35.7	35.7	35.7	35.8	35.8	35.8	35.9	35.9	36	36.1	36.2	36.2	36.2	36.3
Male	37	term infant	Others	16	2.9	Ⅲ	No	109	Yes	36.8	36.6	36.1	36.1	36.1	36.1	36.1	36	35.7	35.4	35.2
Male	37	term infant	Open surgery	3	2.9	Ⅲ	No	92	Yes	36.3	36.3	35.4	35.6	35.7	35.8	35.9	36	35.9
Male	40	term infant	Endoscopic surgery	1	2.9	Ⅲ	No	188	Yes	36	35.3	36.3	36.6	36.2	36.3	36.2	36.5	36.3	36.3	36.2	36.3	36.3	36	36	36	36	33.7	33.7
Male	38	term infant	Open surgery	1	2.9	Ⅱ	No	69	Yes	36.2	36.6	35	35.3	35.5	35.7	35.9	36
Male	35	premature	Open surgery	14	2.9	Ⅱ	No	304	Yes	36.7	36.7	36.7	36.1	36	36.1	36.1	36	36.1	36.1	36	36	36.1	36.1	36.1	36.2	36.2	36.2	36.2	36.1	36.1	36.1	36	36	36	36	36	36.1	36.1	36	35.7
Male	36	premature	Open surgery	1	2.9	Ⅲ	Yes	147	Yes						36.4	36.9	36.3	36.9	36.9	36.3	36.2	34.4	36.5	36.5
Female	40	term infant	Open surgery	2	2.9	Ⅲ	Yes	185	Yes	36.3	36.2	36.1	36	35.8	35.6	35.3	35.2	35.2	35.1	35.1	35	35.1	35.3	35.5	35.7	35.8	35.9
Male	40	term infant	Open surgery	2	2.9	Ⅱ	Yes	79	No			36	36	36.1	36.3	36.5	36.6
Male	38	term infant	Endoscopic surgery	5	2.92	Ⅱ	No	424	Yes	36.3	36.3	36.3	36.3	36.3	36.3	36.4	36.2	36.1	35.9	35.9	35.7	35.6	35.6	35.4	35.3	35.2	35.1	35.4	35	35.3	35.3	35.4	35.5	35.4	35.2	34.8	34.7	34.7	34.7	34.6	34.5	34.5	34.7	34.4	34.5	34.8	34.8	34.8	34.8
Male	35	premature	Endoscopic surgery	4	2.93	Ⅲ	No	195	Yes	36.4	36.4	36.4	36.2	36.3	36.1	35.8	35.9	36.1	36.2	36.4	36.6	36.6	36.6	36.6	36.5	36.5	36.5	36.7	36.7
Male	38	term infant	Others	6	2.95	Ⅲ	Yes	118	Yes	36.1	36	35.7	35.6	35.6	35.6	35.6	35.7	35.9	36	36.1
Female	36	premature	Endoscopic surgery	2	2.95	Ⅲ	Yes	271	Yes	36.5	36.2	36	35.5	35.3	35.3	35.2	35.1	35.2	35.2	35.2	35.2	35.2	35.3	35.4	35.5	35.5	35.6	35.7	35.7	35.7	35.8	35.8	35.9	35.9	36
Male	38	term infant	Open surgery	1	2.95	Ⅲ	Yes	100	Yes	36.3	36.4	36.1	36.2	36.1	36	35.8	35.5	36.5	36.5	36.5
Female	37	term infant	Open surgery	3	2.96	Ⅲ	No	157	Yes	36.1	35.5	35.2	34.9	34.8	34.7	34.7	34.6	34.5	34.6	34.6	34.7	34.7	34.8	34.9	33.3
Male	39	term infant	Others	8	2.97	Ⅲ	No	71	Yes	36.6	36.5	36.2	35.8	36.2	36	36.5
Male	38	term infant	Others	26	2.98	Ⅲ	No	76	No	36.6	36.9	37.1	37.2	37.3	37.3	37.4
Female	41	term infant	Endoscopic surgery	1	3	Ⅳ	No	219	No	36.4	36.5	36.4	36.4	36.4	36.4	36.2	36.2	36	36	36.1	36.4	36.3	36.3	36.3	36.3
Male	36	premature	Open surgery	8	3	Ⅲ	Yes	174	No			36.1	36.2	36.1	36.2	36.3	36.3	36.4	36.6	36.8	37	37	37	36.9	36.9	36.8
Male	38	term infant	Open surgery	1	3	Ⅱ	No	86	Yes	36	36	35.8	35.6	35.5	35.4	35.4	35.4	35.4
Female	40	term infant	Endoscopic surgery	1	3	Ⅲ	Yes	286	Yes	36.6	35.3	35.2	34.9	34.8	34.9	34.9	34.9	34.9	35	35	35.1	35.1	35	35	35	35.1	34.7	34.5	34.4	34.3	34.4	34.4	34.5	34.6	34.6	34.6	34.7	35
Male	39	term infant	Open surgery	1	3	Ⅱ	No	55	Yes	36.1	36	36.1	36	35.9
Female	38	term infant	Endoscopic surgery	2	3	Ⅲ	No	143	Yes	36.2	36	35.7	35.5	35.2	35.1	35.1	35	35	35	35	35	35.2	35.4
Male	37	term infant	Endoscopic surgery	8	3	Ⅲ	No	61	Yes	36	36	34.9	35.1	34.8	35.3	36
Female	40	term infant	Open surgery	6	3	Ⅲ	No	90	No	36.5	36.5	36.9	36.7	36.5	36.5	36.6	36.6	36.5
Male	35	premature	Others	27	3	Ⅱ	No	95	Yes	36.4				35.3	35.2	34.9	35	35.2
Female	40	term infant	Open surgery	5	3	Ⅱ	No	85	Yes	36.1			35.8	35.7	35.3	35.3	34.4
Male	37	term infant	Endoscopic surgery	8	3	Ⅱ	No	343	Yes	36	35.9	35.9	35.9	35.5	35.4	35.4	35.4	35.7	35.8	35.8	35.8	35.8	35.9	35.9	35.9	35.9	36	36	36	35.9	35.9	35.9	36	36	35.9	35.9	35.9	35.9	35.9	35.9	35.9	35.9	35.9
Female	36	premature	Open surgery	24	3	Ⅲ	No	184	Yes	36.5	36.5	36.5	36.5	36.5	36.5	36.5	36.5	36.5	36	34.7	35.2	35.6	36.1	36.4	36.5	36.7	36.8	36.9
Male	37	term infant	Endoscopic surgery	16	3	Ⅲ	No	220	No	36.5	36.5	36.5	36.7	36.5	36.7	36.5	36.6	36.7	36.5	36.7	36.5	36.5	36.5	36.5	36.5	36.4	36.5	36.5	36.5	36.5	36.5	36.5
Female	39	term infant	Open surgery	2	3	Ⅲ	No	81	Yes	36.5	35.1	35	35	35	35	35.1	34.6
Male	40	term infant	Endoscopic surgery	1	3	Ⅱ	No	135	Yes	36.3	36.3	36.3	36.3	36.3	36.3	36.3	36.3	35.9	36.1	36.3	36.5	36.6	36.6
Female	40	term infant	Open surgery	1	3	Ⅲ	Yes	76	Yes	36	35.9	35.7	35.6	35.6	35.6	35.6
Male	36	premature	Others	7	3	Ⅱ	No	254	Yes	36.2	35.6	35.6	36	35.7	35.8	35.8	35.8	36	35.8	35.8	35.8	36	36	36	36	36	36	36	36	36	36	36	36	36.2
Female	39	term infant	Open surgery	3	3	Ⅱ	Yes	164	Yes	36.5	35.4	35.7	35.5	35.2	34.8	34.7	34.5	34.4	34.4	34.5	34.4	34.5	34.6	34.7	35	35.5
Female	38	term infant	Open surgery	1	3.02	Ⅲ	Yes	159	Yes	36				34.4	34.2	33.9	33.8	33.9	34	34.3	34.4	34.6	34.9	35.1
Female	38	term infant	Endoscopic surgery	2	3.02	Ⅱ	No	169	Yes	36.2	36.2	35.5	35.7	36.1	36.3	36.2	36	35.8	35.3	35.6	35.9	36.1	36.4	36.6	36.8	36.8
Female	38	term infant	Open surgery	4	3.03	Ⅲ	No	75	Yes	36	35.9	36	36	35.9	34.6	34.7	34.9
Male	36	premature	Endoscopic surgery	24	3.03	Ⅱ	No	47	No	36.3	36.3	36.1	36.2	36.3
Male	37	term infant	Others	1	3.04	Ⅱ	Yes	63	No	36.2	36.2	36.2	36.2	36.2	36.3
Male	38	term infant	Endoscopic surgery	4	3.04	Ⅱ	No	389	Yes				35.8	35.6	35.3	35.1	35.8	34.6	34.4	34.2	34.2	34.1	34	33.9	33.8	33.7	33.9	34.3	34.7	35.1	35.4	35.7	35.9	36.1	36.3	36.5	36.7	36.8	37	37.1
Male	37	term infant	Others	7	3.04	Ⅲ	No	129	Yes	36.3	36.1	35.9	35.7	35.6	35.2	34.7	34.5	34.4	34.4	34.4	34.6
Male	39	term infant	Open surgery	1	3.05	Ⅲ	No	95	No		36.1	36.2	36.6	36.6	36.5	36.4	36.3	36.3	36.2
Female	37	term infant	Others	8	3.05	Ⅱ	No	60	No			36.3	36	36	36	36	36	36	36	36	36	36
Male	39	term infant	Open surgery	1	3.06	Ⅱ	No	259	Yes	36.2										36.2	36.3	36.3	36.3	35.8	36.2	36.3	36.4	36.5	36.7	36.8	37	37.1	37.2
Female	37	term infant	Open surgery	1	3.06	Ⅲ	Yes	195	Yes	36.3	34.6	34.9	34.7	34.8	34.9	34.9	34.9	34.9	35	35	35.1	35.1	35.2	35.2	35.1	35.2	35.2	35.1
Female	39	term infant	Endoscopic surgery	14	3.07	Ⅲ	No	332	Yes	36.5						35.9	35.8	35.7	35.5	35.1	35.1	35	34.9	34.8	34.7	34.8	34.8	34.7	34.7	34.7	34.6	34.6	34.6	34.6	34.5	34.5	34.4	34.4	34.3	34.2	34.1	34.1	34
Male	39	term infant	Endoscopic surgery	5	3.07	Ⅱ	No	355	Yes	36	36	36	36	36	36	35.9	35.9	35.9	35.9	36	36	36	36	35.9	35.9	36	36	36.1	36	36	36	36	36.2	36.3	36.4	36.4	36.5	36.4	36.5	36.4	36.4	36.3	36.3
Male	37	term infant	Open surgery	3	3.07	Ⅲ	No	234	No		36.3	36.2	36.2	36.2	36.1	36	36.1	36.2	36.2	36.2	36.2	36.2	36.2	36.2	36.2	36.2	36.2	36.2	36.1	36	36	36	36
Male	38	term infant	Open surgery	3	3.07	Ⅲ	No	190	Yes	35.8	35.6	35.3	35	35.1	35.1	35	35.1	35	35	35	35	35.1	35.2	35.4	35.6	35.8	36
Female	38	term infant	Open surgery	18	3.07	Ⅳ	Yes	86	No	36.5			36.5		36.3	36.3			36.5		36.5
Male	38	term infant	Endoscopic surgery	8	3.08	Ⅱ	No	380	Yes	36.5	36.5	36.5	36.5	36.5	36.6	36.7	36.7	36.7	36.8	36.9	36.9	37	37	36.9	36.7	36.5	36.2	36	35.9	36.1	36.2	36.5	36.7	36.8	36.9
Female	39	term infant	Open surgery	1	3.08	Ⅲ	No	94	Yes	36.1	35.6	35.3	35.2	35	35	35	35	35
Female	40	term infant	Endoscopic surgery	27	3.08	Ⅲ	No	106	Yes	36.1	35.8	35.7	35.2	35	35.2	35.1	35	35.3	35.8
Male	37	term infant	Endoscopic surgery	3	3.1	Ⅲ	Yes	113	Yes	36	35.9	35.8	35.7	35.7	35.8	35.8	35.8	35.8	35.8	35.8	35.8
Male	39	term infant	Endoscopic surgery	4	3.1	Ⅲ	No	189	No	36.6	36.6	36.5	36.3	36.2	36.1	36.3	36.4	36.3	36.4	36.5	36.3	36.3	36.2	36.1	36.1	36.1	36
Male	40	term infant	Endoscopic surgery	1	3.1	Ⅲ	No	103	Yes	35.3	35	35.8	35.9	35.9	35.9	35.9	35.9	35.9	35.9
Female	34	premature	Endoscopic surgery	1	3.1	Ⅲ	Yes	161	Yes	36.1	35.9	35.7	35.6	35.5	35.5	35.6	35.6	35.5	35.4	35.3	35.3	35.3	35.3	35.3	35.3
Male	35	premature	Open surgery	2	3.1	Ⅲ	Yes	202	Yes	36.1	36	35.8	35.6	35.5	34.8	34.8	34.9	35.1	35.2	35.3	35.4	35.5	35.6	35.6	35.6	35.6	35.7	35.6	35.6
Female	40	term infant	Others	1	3.1	Ⅲ	No	146	No	36.5	36.6	36	36	36	36	36	36	36	36	36.1	36.2	36.3	36.4	36.2
Male	39	term infant	Open surgery	1	3.1	Ⅲ	No	129	Yes	36.3	36.2	36.1	35.8	35.5	35.6	35.6	35.6	35.6	35.6	35.6	35.6	35.6
Female	38	term infant	Others	21	3.1	Ⅲ	No	40	Yes	35.2	34.8	35.1	35.3
Female	39	term infant	Others	3	3.1	Ⅲ	No	268	Yes	36		35	35	34.8	34.8	34.8	34.8	34.8	34.8	34.8	35	35.3	35.6	35.9	36.2	36.3	36.4	36.5	36.6	36.7	36.7	36.7	36.8	36.9	37
Male	38	term infant	Endoscopic surgery	1	3.1	Ⅱ	Yes	110	Yes	36.1	35.8	35.9	35.8	35.6	35.6	35.6	35.6	35.6	35.6
Male	38	term infant	Endoscopic surgery	20	3.1	Ⅱ	No	59	No	36.1	36.4	36.2	36.1		36.1	36.6
Male	36	premature	Endoscopic surgery	24	3.1	Ⅱ	No	317	Yes	36.6		36	35.9	35.7	35.6	35.4	35.1	34.9	34.7	34.5	34.4	34.3	34.2	34.2	34.3	34.4	34.5	34.7	34.7	34.9	35.1	35.2	35.4	35.6	35.7	35.7	35.8	35.9	35.9	36	36.1
Male	40	term infant	Others	6	3.1	Ⅲ	No	85	Yes	36.5	36.5	36	36.8	35.4	36.5	36.4	34.9	36.5	36.5
Male	39	term infant	Open surgery	2	3.1	Ⅲ	No	202	Yes	36.1		35.5	35.5	35.5	34.5	34.6	34.4	34.2	34.3	34.6	34.9	35.2	35.3	35.3	35.3	35.3	35.3	35.4
Male	40	term infant	Endoscopic surgery	8	3.1	Ⅱ	Yes	131	No	36.1	36.1	36	36.1	36.1	36.1	36.1	36.1	36.1	36.2	36.2	36.2	36.2
Female	39	term infant	Open surgery	6	3.1	Ⅲ	No	123	Yes	36	36	35.3	34.9	34.6	34.4	34.1	33.9	33.6	34.1	34.6	35.1
Male	39	term infant	Open surgery	1	3.1	Ⅱ	Yes	57	No	36.5	36.4	36.4	36.4	36.4
Female	36	premature	Endoscopic surgery	1	3.1	Ⅲ	Yes	167	No	36.2	36.1	36	36.1	36	36.1	36	36	36	36.1	36.1	36	36	36.1	36.1	36	36	36
Male	39	term infant	Others	12	3.1	Ⅱ	No	88	No	36.4	36.3	36.2	36.1	36.1	36.1	36.1	36	36
Male	38	term infant	Endoscopic surgery	1	3.11	Ⅱ	Yes	216	Yes	36.6	36.6	36.6	36.4	36.4	36.5	36.6	36.2	36.7	36.6	37.8	36.6	36.6	36.7	36.6	36.8	36.7	36.6	36.7	36.6	36.8	35.3
Female	39	term infant	Open surgery	10	3.11	Ⅲ	No	299	Yes	36.4			35.5	35	34.8	34.9	34.9	35.1	35.3	35.1	35.5	35.8	36.1	36.4	36.5	36.7	36.9	37	37.1	37.2	37.3	37.4	37.5		37.2	37.1	37	36.8
Female	39	term infant	Endoscopic surgery	2	3.12	Ⅱ	Yes	130	Yes	35.8	35.4	35.2	35.6	35.8	35.8	35.8	35.8	35.8	35.8	35.9	36	36.2	36.5
Male	39	term infant	Others	6	3.12	Ⅲ	No	85	No	36.3	36.3	36.2	36.3	36.1	36.1	36.1	36.1	36.1	36.1
Male	38	term infant	Endoscopic surgery	2	3.12	Ⅲ	No	296	Yes	36.1			35.3	35.8	35.4	35.3	35.3	35.4	35.5	35.6	35.7	35.9	35.9	36	36.1	36.2	36.3	36.4	36.4	36.3	36.2	36.1	36	36.1	36.1	36.2	36.1	36.1	36.1	36.2
Male	41	term infant	Endoscopic surgery	1	3.13	Ⅲ	No	265	No									36														36.4	36.4	36.6
Male	37	term infant	Open surgery	4	3.14	Ⅱ	No	215	Yes	36	35.5	35.3	35.3	35.3	35.2	35.3	35.4	35.6	35.7	35.8	36	36.1	36.2	36.4	36.4	36.4	36.4	36.3	36.5	36.4
Female	40	term infant	Open surgery	1	3.14	Ⅲ	Yes	127	Yes	36.5		35.2	34.8	34.7	34.8	34.9	35	35.1	35.3	35.3
Male	38	term infant	Open surgery	1	3.15	Ⅱ	No	127	Yes	36.5	36.2	36.1	35.8	35.6	35.5	35.3	35.2	35.2	35.2	35.1	35.1	35
Male	38	term infant	Endoscopic surgery	1	3.15	Ⅱ	Yes	227	Yes	36.5						36	35.9	35.9	35.8	35.8	35.9	35.9	35.7	35.6	35.5	35.6	35.6	35.7	35.7	35.8	35.8	35.8
Male	39	term infant	Open surgery	2	3.15	Ⅱ	No	238	Yes	36.3	36.3	36.3	36.3	36.2	36.3	36.2	36.2	36.1	36.1	35.9	35.9	36.1	36.5	35.9	36	35.9	36.3	36.2	36.4	36.2	36.5	36.5
Male	38	term infant	Open surgery	3	3.15	Ⅲ	Yes	58	No			36.1	36	36	36
Male	39	term infant	Open surgery	1	3.15	Ⅲ	Yes	67	Yes	35.9	36.1	35.9	36.1	36.2	36.5
Female	42	term infant	Open surgery	5	3.16	Ⅲ	No	130	Yes	36.5	36.3	36.1	36	36	35.9	35.9	35.9	35.9	35.9	35.8	35.8
Female	40	term infant	Open surgery	10	3.19	Ⅳ	Yes	198	Yes	36.1			36	35.2	35.2	34.8	34.6	34.9	34.9	34.8	34.7	34.6	34.6	34.6	34.7	34.7	34.9	35
Female	39	term infant	Open surgery	3	3.2	Ⅲ	No	294	Yes	36.2	36	35.5	35.2	35.2	34.8	34.7	34.6	34.6	34.5	34.6	34.6	34.6	34.6	34.5	34.5	34.6	34.6	34.6	34.5	34.6	34.6	34.5	34.5	34.6	34.6	34.5	34.5	35.5
Male	39	term infant	Endoscopic surgery	3	3.2	Ⅱ	No	157	Yes	36.3	36.3	36.2	35.9	35.9	35.9	35.8	35.8	35.8	35.8	35.8	35.9	35.9	35.8	36	36
Male	41	term infant	Open surgery	2	3.2	Ⅱ	Yes	66	Yes	35.3	35.3	35.3	35.4	35.4	35.4	35.8
Male	40	term infant	Open surgery	1	3.2	Ⅲ	Yes	72	No	36.5	36.6	36.3	36.3	36.3	36.3	36.3	36.3
Male	37	term infant	Others	6	3.2	Ⅲ	No	146	Yes	36	35.7	35.5	35.2	34.8	34.6	34.6	34.6	34.6	34.7	34.8	34.7	34.6	34.6
Female	40	term infant	Open surgery	4	3.2	Ⅲ	No	77	Yes	35.4	35.5	35.5	35.6	35.5	35.6	35.7
Male	37	term infant	Open surgery	10	3.2	Ⅲ	No	177	Yes	36.4	36.4	35.8	35.6	35.6	35.6	35.6	34.9	34.6	34.3	34.3	34.4	34.3	34.3	34.2	34.3	34.5	35.9
Male	38	term infant	Open surgery	3	3.2	Ⅲ	No	156	Yes	36.5						36.1	36	35.9	36	36.1	36.1	36.1	36.3	36.5	36.7
Female	37	term infant	Others	24	3.2	Ⅱ	No	53	Yes	36.2	35.6	35.3	35.2	35.1
Male	36	premature	Endoscopic surgery	3	3.2	Ⅳ	No	172	Yes	36.5	36.5	36.5	36.5	36.5	36.5	36.5	36.2	36.5	36.5	35.8	35.7	35.5	35.4	35.3	35.3	35.2	35.1
Male	38	term infant	Endoscopic surgery	23	3.2	Ⅱ	Yes	85	Yes	36	36	36.5	36.5	36.2	36.2	36.2	36.2	36.1	36	35.9
Male	39	term infant	Open surgery	2	3.2	Ⅱ	Yes	66	No		36.3	36.3	36.3	36.3	36.5	36.6
Female	39	term infant	Endoscopic surgery	5	3.2	Ⅰ	No	155	Yes	36.2	36	35.8	35.8	35.9	36	36.1	36.2	36.3	36.4	36.5	36.5	36.7	36.7	36.8	36.8	36.8
Male	39	term infant	Open surgery	2	3.2	Ⅲ	Yes	80	Yes	35.4	36	35.9	35.9	36	36	36	36
Male	39	term infant	Open surgery	11	3.2	Ⅱ	No	108	No	36.5						36.5
Male	38	term infant	Others	5	3.2	Ⅲ	No	138	Yes	36	36	35.5	35.2	35.3	35.3	35.4	35.4	35.5	35.5	35.5	35.6
Female	40	term infant	Open surgery	8	3.2	Ⅲ	Yes	124	Yes	36.2	36.1	36.1	36	36	35.9	35.8	35.6	35.5	35.5	35.5	35.5
Male	34	premature	Open surgery	5	3.2	Ⅳ	No	154	Yes	35	35	35	35	35	35	35.1	35.1	35.1	35.1	35.1	35.1	35.1	35.1	35.2	35.3	35.4
Male	39	term infant	Endoscopic surgery	12	3.21	Ⅱ	No	132	Yes	36.1	36.2	36.2	36.2	36.2	36.2	36.2	36.1	36.1	36.2	35.5	34
Female	38	term infant	Endoscopic surgery	8	3.22	Ⅱ	Yes	162	Yes	36.1	36	36	35.7	35.7	35.8	35.8	35.7	35.7	35.6	35.6	35.6	35.6	35.8	35.8	35.9
Male	39	term infant	Open surgery	7	3.22	Ⅲ	No	167	Yes	36.1				34	34	34		34.1	34.6	34.9	35.4	35.9	36.4	37	37.4
Male	38	term infant	Open surgery	3	3.23	Ⅲ	No	113	Yes	36.2	36	35.8	35.6	35.6	35.7	35.8	35.8	35.9	36	36.1
Female	40	term infant	Open surgery	3	3.24	Ⅲ	Yes	184	Yes	36.3	36.3	36.1	36.1	36	36	36	35.9	35.8	35.7	35.7	35.7	35.7	35.8	35.8	35.9	35.9	35.9
Male	36	premature	Open surgery	2	3.25	Ⅲ	Yes	90	Yes	36	35.9	36.1	35.8	35.7	35.7	35.8	35.8	35.7
Male	39	term infant	Open surgery	2	3.25	Ⅲ	Yes	179	Yes	36	36	36	36	35.6	35.5	35.3	35.3	35	35	35	35	35	35	35	35	35	35
Male	38	term infant	Endoscopic surgery	4	3.25	Ⅲ	No	302	Yes	36	36	33.5	33.5	33.5	33.6	33.2	33	32.7	32.7	32.9	33.1	33.4	33.6	33.9	34.1	34.3	34.5	34.6	34.7	34.8	34.9	34.9	35	35	35.1	34.9	34.9	34.8
Female	39	term infant	Others	1	3.25	Ⅲ	No	169	Yes	36.1	36.1	36.1	36.1	36	35.9	35.9	36	36.2	36.4	36.4	36.5	36.6	36.8	37	37.2	37
Female	39	term infant	Endoscopic surgery	14	3.26	Ⅱ	No	368	Yes	36.7					36.4	36.2	36.1	36	36.4	36.4	36.4	36.4	36.3	36.5	36.5	36.4	36.4	36.5	36.4	36.3	36.4	36.5	36.4	35.6	35.7	35.8	36	36.1	36.1	36.2	36.2	36.2	36.3	36.2	36.2	36.2
Male	37	term infant	Others	1	3.27	Ⅲ	No	70	Yes	35.6	35.6	35.5	35.4	35.4	35.5	35.5
Male	38	term infant	Open surgery	2	3.28	Ⅲ	No	135	Yes	35.5	35.5	35.5	35.5	35.5	35.1	35.1	35.1	35.1	35.1	35.1	35.2	36.4
Female	39	term infant	Open surgery	2	3.29	Ⅲ	No	189	Yes	35.2	35.3	35.1	35.1	35.1	35.2	35.3	35.5	35.8	36.1	36.2	36.2	36.2	36.2	36.2	36.2	36.1	36.4
Male	38	term infant	Others	3	3.3	Ⅲ	Yes	73	Yes	36.5		36	35.9	35.8	35.7	35.8
Male	41	term infant	Endoscopic surgery	3	3.3	Ⅱ	No	137	Yes	36.3	36.2	36	35.9	35.9	35.5	35.3	35	35	34.8	35	35	35	34.9	35.7
Male	39	term infant	Others	3	3.3	Ⅲ	Yes	94	Yes	36	35.7	35.8	35.6	35.6	35.5	35.5	35.6	35.8
Male	38	term infant	Endoscopic surgery	8	3.3	Ⅱ	No	325	Yes	36.2		36.1	35.8	35.7	35.5	35.4	35.3	35.3	35.3	35.2	35.2	35.3	35.3	35.2	35.2	35.2	35.3	35.3	35.3	35.4	35.3	35.2	35.2	35.2	35.2	35.1	35.1	35.1	35.1	35.1	35.3
Female	39	term infant	Open surgery	1	3.3	Ⅲ	No	91	Yes	36.5	36.3	35.9	35.1	35.3	35.3	35.7	35.6	35.8
Female	38	term infant	Others	26	3.3	Ⅲ	Yes	400	Yes	36	36	36.1	36	36.2	36.2	36.4	35.6	35.5	35.5	35.7	35.8			35.5	35.4	35.4	35.4	35.4	35.5	35.6	35.6	35.7	35.7	35.8	35.8	35.9	35.9	35.9	35.8	35.8	35.6	35.6	35.6	35.6	35.5	35.5	35.4	35.4	35.6
Male	38	term infant	Open surgery	10	3.3	Ⅱ	No	103	Yes	35	35.5	35.4	35.4	35.5	35.6	35.5	35.5	35.5	35.6
Male	42	term infant	Endoscopic surgery	2	3.3	Ⅲ	Yes	206	No	36.1	36.2	36	36.1	36.4	36.2	36.2	36.1	36.2	36.2	36.2	36.2	36.3	36.4	36.1	36.1	36.1	36.1
Female	40	term infant	Open surgery	11	3.3	Ⅱ	No	165	Yes	36.1	36.1	36.1	36.1	36.1	35.5	35.3	35.5	35.1	34.9	34.8	34.5	34.1	34.1	34	34.1	34.3
Male	40	term infant	Open surgery	2	3.3	Ⅲ	Yes	172	Yes	36.7				35.6	35.5	35.4	35.4	35.3	35.2	35	35	34.9	34.8	34.8	34.8	34.8	34.8	35
Male	37	term infant	Endoscopic surgery	2	3.3	Ⅲ	Yes	175	Yes	36.2	36	35.6	35	35.2	35	34.9	34.8	34.7	34.6	34.4	34.4	34.4	34.4	34.5	34.5	34.6	34.7
Female	38	term infant	Open surgery	18	3.3	Ⅲ	No	164	Yes	36	36	35.8	35.8	35.6	35.6	35.7	35.8	35.8	36	36.1	36.2	36.1	36.1	36.1	36.1
Male	38	term infant	Others	3	3.3	Ⅱ	No	90	Yes	36.1	36	35.7	35.6	35.5	35.6	35.7	35.8	35.8
Female	39	term infant	Endoscopic surgery	1	3.3	Ⅲ	Yes	261	Yes	36.4	36.1	36.1	36.1	36	35.8	35.8	35.8	35.9	35.8	35.9	35.9	35.9	35.9	35.9	36	36.1	36.1	36.2	36.3	36.4	36.4	36.4	36.4	36.4	36.4	36.4
Male	39	term infant	Others	4	3.31	Ⅲ	No	122	Yes	36.5	36.5	35.8	35.7	35.8	35.4	35.4	35.5	35.7	35.9	36.1	36.4	36.5
Male	40	term infant	Open surgery	1	3.32	Ⅲ	No	136	Yes	36.3	36.1	35.8	35.8	35.8	35.7	35.7	35.6	35.6	35.6	35.7	35.7	35.8	36
Male	40	term infant	Open surgery	20	3.32	Ⅲ	Yes	111	No	37	36.9	36.9	36.9	36.8	36.9	36.9	36.9	36.8	36.8
Female	39	term infant	Open surgery	4	3.32	Ⅲ	Yes	84	Yes	35.9	35.7	35.5	35.5	35.5	35.5	35.4	35.5
Female	40	term infant	Others	6	3.34	Ⅱ	No	195	Yes	36.3	35.9	36	36.1	36.2	36	35.9	35.9	35.8	35.9	35.8	35.7	35.6	35.4	35.3	35.2	35.1	35.2
Male	39	term infant	Endoscopic surgery	16	3.34	Ⅲ	No	171	Yes	35.9	35.8	35.9	35.8	36	36.3	36.5	36.6	36.8	37	37.1	37.2	37.3	37.5	37.3	37.3	37.3	37.6	37.9	36.5
Male	39	term infant	Endoscopic surgery	11	3.35	Ⅲ	No	109	Yes	36.3	36.1	35.9	35.8	35.8	35.9	35.9	35.9	35.9	36	36
Female	39	term infant	Others	8	3.35	Ⅲ	No	91	Yes		35	33	34	33	33	34	34	35	35	35
Male	40	term infant	Open surgery	1	3.35	Ⅲ	Yes	109	Yes	36	36	36	36	36	36	36	35.9	36	36	36
Male	40	term infant	Endoscopic surgery	16	3.35	Ⅱ	No	69	Yes	36	35.4	35.5	35	35	35.1	35.1
Female	40	term infant	Others	6	3.36	Ⅲ	No	90	No		36	36.2	36.2	36.2	36.3	36.3	36.4	36.4
Male	39	term infant	Open surgery	3	3.37	Ⅱ	Yes	132	Yes	36	35.9	36	35.9	35.8	35.8	35.7	35.6	35.6	35.5	35.4	35.8	36
Female	38	term infant	Others	23	3.38	Ⅱ	No	90	No			36.7	36.8	36.8	36.8	36.7	36.6	36.7	36.7
Male	39	term infant	Endoscopic surgery	7	3.38	Ⅱ	Yes	99	Yes	35.6	35.6	35.6	35.1	34.6	34.3	34.2	34.2	34.2	34.4
Male	39	term infant	Endoscopic surgery	2	3.39	Ⅲ	No	62	Yes	36.1	35.1	34.6	34.8	34.8	34.7
Male	39	term infant	Others	1	3.39	Ⅲ	Yes	87	Yes	36.1	36.5	36	35.7	35.7	35.8	35.8	35.9	35.7
Male	38	term infant	Endoscopic surgery	25	3.4	Ⅲ	No	72	No		36.4	36.2	36.3	36.4	36.5	36.5
Male	40	term infant	Endoscopic surgery	2	3.4	Ⅱ	No	223	No	36.5	36.3	36	36.1	36.3	36.6	36.5	36.2	36.3	36.1	36.3	36.3	36.2	36.2	36.3	36.1	36	36.2	36	36.3	36.3	36.3	36
Female	40	term infant	Endoscopic surgery	3	3.4	Ⅳ	No	269	Yes	36.1	36.2	36.1	36.1	36	35.8	35.7	35.6	35.7	35.8	35.9	36	36	36.1	36.1	36.2	36.2	36.3	36.4	36.4	36.4	36.1	36.2	36.3	36.3	36.2
Male	39	term infant	Others	3	3.4	Ⅱ	No	65	No	36.4	36.1	36.1	36.1	36.1	36.1	36.4
Female	39	term infant	Open surgery	1	3.4	Ⅱ	No	115	Yes	35.7	35.8	35.7	35.6	35.4	35	34.8	35	35	34.9	34.9	34.8
Female	40	term infant	Endoscopic surgery	8	3.4	Ⅲ	No	93	No			36.3	36.3	36.4	36.6	36.6	36.8	36.7	36.7
Male	39	term infant	Endoscopic surgery	1	3.41	Ⅲ	No	246	Yes	36.3		35.4	35.5	35.3	35.4	35.4	35.6	35.6	35.7	35.7	35.8	35.8	35.8	35.8	35.8	35.7	35.7	35.7	35.7	35.7	35.5	36	36.2	36.1
Male	39	term infant	Others	1	3.43	Ⅱ	Yes	55	Yes	36	36	35.9	36.1	36.3	36.5
Male	39	term infant	Others	20	3.44	Ⅳ	No	184	Yes	36.5	36	36.5	36.3	36.2	36.1	36.1	36.1	36.1	36.2	36.3	36.4	36.5	36.7	36.7	36.7	36.8	36.8	33.1
Female	38	term infant	Endoscopic surgery	6	3.45	Ⅱ	No	117	Yes	36.4	35.6	35.7	35.7	35.7	35.7	35.6	35.5	35.5	35.5	35.5	35.5
Female	39	term infant	Open surgery	4	3.45	Ⅱ	Yes	144	Yes	36.5	36.6	36.6	36.5	36.4	36.4	36.3	36.3	36.3	36.4	35.5	35.6	35.8	35.9
Male	38	term infant	Endoscopic surgery	26	3.45	Ⅲ	No	305	Yes	36	36	36	36.1	36.3	35.2	36.1	36.2	36	36.1	36	35.9	35.7	35.6	35.7	35.9	35.9	35.9	36	36	35.9	35.9	35.8	35.7	35.8	35.9	36	36	36.1	36.2
Female	40	term infant	Others	10	3.48	Ⅱ	No	98	Yes	36.1	36	36.1	35.7	35.6	35.7	35.7	35.8	35.9	36.1	36.1
Male	39	term infant	Open surgery	2	3.48	Ⅲ	No	60	No	36.2	36.2	36.2	36	36	36.2
Male	41	term infant	Endoscopic surgery	23	3.48	Ⅱ	No	107	Yes	35.7	35.7	35.7	35.7	35.7	35.7	35.7	35.6	35.6
Male	39	term infant	Endoscopic surgery	12	3.49	Ⅲ	No	80	Yes	36.7	36.7	36.7	36.7	36.7	36.5	36.6	34.4		34.1	34.2	34.5	34.8
Male	40	term infant	Open surgery	2	3.5	Ⅱ	Yes	68	Yes	36.5	36.5	36.5	35.9	35.6	35.8	36.1
Female	38	term infant	Others	24	3.5	Ⅲ	No	89	No	36.6					36.6								36.5
Female	39	term infant	Endoscopic surgery	12	3.5	Ⅲ	No	134	Yes	35	35.7	35.5	35.3	35.2	35.3	35.4	35.5	35.5	35.6	35.7	35.8	35.8
Male	41	term infant	Endoscopic surgery	15	3.5	Ⅱ	Yes	195	Yes	36.3				36.1				35.8			35.9			35.8				35.8		35.8	35.1
Male	38	term infant	Open surgery	25	3.5	Ⅲ	No	49	Yes	36.3	35.9	35.6	35.4	35.4	35.4
Male	40	term infant	Open surgery	12	3.5	Ⅲ	No	79	No			36.7	36.7	36.7	36.7	36.8	36.8
Male	38	term infant	Open surgery	1	3.5	Ⅲ	Yes	178	No	36.3	36.3	36.3	36.3	36.2	36.3	36.5	36.5	36.4	36.4	36.5	36.6	36.7	36.8	36.9	37	37	37.1	37.2
Male	38	term infant	Endoscopic surgery	1	3.5	Ⅲ	Yes	124	No	36.6	36.5	36.6	36.7	36.6	36.8	36.6	36.6	36.9	37	36.8	36.7	36.4
Male	38	term infant	Endoscopic surgery	25	3.5	Ⅱ	No	95	No		36.2	36.2	36.2	36.2	36.3	36.2	36.2	36.2	36.2
Male	41	term infant	Open surgery	12	3.5	Ⅲ	No	85	No		36.4	36.4	36.3	36.3	36.2	36	36.1
Male	39	term infant	Open surgery	15	3.5	Ⅲ	No	140	No	36.5				36.5	36.1	36.5	36.5	36.5	36.5	36.5	36.5	36.5	36.5
Male	40	term infant	Open surgery	2	3.5	Ⅱ	Yes	160	Yes	36.5	36.3	36.1	36	35.8	35.6	34.9	35	35	35.7	35.5	35.5	35.5	35.5	35.7	35.8
Female	37	term infant	Open surgery	1	3.55	Ⅲ	Yes	348	Yes	36.5	36.4	36.5	36.5	36.2	36.3	36.5	36.5	36.6	36.5	36.5	36.4	36.3	36.2	36.3	36.4	36.6	36.6	36.5	36.5	36.7	36.8	36.6	36.8	36	35.8	35.9	36.3	37.3	36.6	36.4	36.2	36.4	36.4	36.5	36.5
Male	38	term infant	Endoscopic surgery	8	3.55	Ⅱ	Yes	155	Yes	36	34.6	34.5	34.2	34.1	34	33.9	33.9	34	34.1	34.2	34.2	34.3	34.5	34.6	34.7
Male	40	term infant	Others	4	3.58	Ⅱ	No	130	Yes	36	36	36	35.7	35.7	35.6	35.6	35.6	35.6	35.8	36	36.1	36.2
Male	40	term infant	Open surgery	1	3.6	Ⅱ	No	47	Yes	36.2	35.9	35.8	35.7
Male	37	term infant	Open surgery	1	3.6	Ⅲ	No	201	Yes	36.3	36.2	35.9	35.7	35.6	35.5	35.6	35.6	35.6	35.6	35.6	35.6	35.6	35.5	35.5	35.5	35.6	35.7	35	35.8
Male	37	term infant	Endoscopic surgery	23	3.6	Ⅲ	No	359	Yes	36	36	36	36.1	36	36	35.4	35.3	35.3	35.3	35.3	35.2	35.1	35.1	35	35	34.9	34.9	34.9	34.9	35	35.1	34.9	34.9	35	35.2	35.5	35.7	35	35.9	35.9	36	36	35.9	35.9	35.9
Male	39	term infant	Endoscopic surgery	1	3.6	Ⅱ	No	96	Yes	36.3	36.3	36.4	36	36.1	36.2	36.3	36.3	35.3	36.3	36.3
Female	39	term infant	Others	1	3.6	Ⅲ	Yes	115	No		36.5	36.5	36.5	36.7	36.7	36.6	36.6	36.5	36.5	36.4	36.5	36.5
Female	38	term infant	Open surgery	9	3.6	Ⅱ	No	145	No			36.2	36.4	36.2	36.2	36.1	36.2	36.2	36.4	36.5	36.6	36.6	36.7	36.8
Male	37	term infant	Others	2	3.6	Ⅲ	No	220	Yes	36.3	36.3	36.3	35.3	35.2	35.1	35.1	35.2	35.2	35.3	35.5	35.8	36	36.1	36.2	36.3	36.5	36.6	36.8	37	37.1	37.2
Male	38	term infant	Others	24	3.6	Ⅱ	Yes	37	No	36.3	36.3	36.3	36.3
Female	38	term infant	Endoscopic surgery	1	3.6	Ⅱ	No	174	Yes	36.5		35.9	35.8	35.6	35.5	35.5	35.5	35.4	35.5	35.5	35.7	35.8	36	36.2
Female	39	term infant	Endoscopic surgery	19	3.62	Ⅲ	No	73	No		36.1	36.3	36.1	36.1	36.1	36.1
Female	37	term infant	Endoscopic surgery	1	3.63	Ⅲ	Yes	293	Yes	36.1	36.1	36.1	35.8	35.8	35.6	35.8	34.9	34.8	35.2	35.3	35.3	35.2	35.2	35.3	35.3	35.3	35.4	35.4	35.5	35.5	35.5	35.6	35.7	35.8	35.9	36	36	36	35.5
Female	39	term infant	Endoscopic surgery	21	3.64	Ⅲ	No	165	No	36.6		36.5		36.5		36.5		36.4			36.5		36		36.2		36.6
Female	38	term infant	Others	24	3.65	Ⅲ	No	192	Yes	36.1	36.1	36	35.9	35.8	35.8	35.9	35.9	35.9	35.9	35.9	35.9	35.9	35.9	35.9	35.9	35.9	35.9	36	36
Female	39	term infant	Open surgery	7	3.65	Ⅲ	No	202	Yes	36	35.8	35.5	35.3	35	35	35.1	35.5	35.6	35.7	35.9	36.1	36.2	36.3	36.5	36.7	36.8	37	37	37
Male	40	term infant	Open surgery	1	3.66	Ⅲ	Yes	50	No	36.3	36.5	36.5	36.4	36.3	36.3	36.1
Male	38	term infant	Endoscopic surgery	17	3.66	Ⅱ	Yes	160	Yes	36.5	36.5	35.9	35.6	35.4	35.2	35.1	34.9	34.8	34.7	34.6	34.5	34.4	34.3	35	35.1
Male	40	term infant	Open surgery	6	3.66	Ⅱ	No	60	Yes	36.6		36.2	35.9	35.8	35.7	35.7
Male	39	term infant	Endoscopic surgery	28	3.66	Ⅱ	Yes	120	Yes	35.4	35.4	35.3	35.3	35.3	35.3		35.3	35.3	35.3	35.3
Female	33	premature	Others	5	3.67	Ⅲ	No	292	Yes	36.5	36.5						32.3	33.4	34.1	34.2	34.1	34.2	34.5	34.6	34.6	34.9	34.9	35.1	35.2	35.1	35.1	34.1	34.3	34.1	34.6	34.7	34.7	34.8	34.8
Male	38	term infant	Others	1	3.68	Ⅱ	Yes	64	No	36.5	36.6	36.4	36.2	36.3	36.3	36.3
Male	39	term infant	Open surgery	1	3.69	Ⅱ	Yes	162	Yes	36.5	35.4	35.2	35	34.8	34.7	34.6	34.6	34.6	34.6	34.6	34.7	34.7	34.8	34.9	35.1	35.3
Female	40	term infant	Endoscopic surgery	26	3.69	Ⅲ	Yes	67	Yes	36		36.1	36	35.9	36	36
Female	40	term infant	Others	1	3.7	Ⅱ	No	192	Yes	36.3	36	35.8	35.5	35	35	35.3	35	35.2	35.3	35.5	35.7	35.8	35.9	36	36.1	36.3	36.4	36.6	36.7
Male	37	term infant	Endoscopic surgery	21	3.7	Ⅱ	No	305	Yes	36.4	36.3	36.2	36	35.9	35.6	35.4	35.2	35	34.7	34.3	34.3	34.3	34.4	34.4	34.5	34.5	34.6	34.7	34.7	34.7	34.7	34.8	34.9	35.1	35	35.1	35.2	35.3
Female	39	term infant	Others	7	3.7	Ⅲ	Yes	95	Yes	36.2		36	36	36.1	35.8	35.5	35.3	35.4	35.5
Female	40	term infant	Endoscopic surgery	7	3.7	Ⅲ	No	180	Yes	36	36	35.8	35.6		36.9	36.4	35.1	35.1	35.3	35.4	35.5	35.6	35.7	35.8	35.9	36
Female	39	term infant	Endoscopic surgery	25	3.72	Ⅲ	No	69	Yes	36	36	35.7	35.6	35.3
Male	37	term infant	Endoscopic surgery	1	3.73	Ⅱ	No	65	Yes	36	36	35.9	35.6	35.7	35.7	36
Male	40	term infant	Open surgery	3	3.74	Ⅲ	Yes	108	No		36.7	36.4	36.4	36.4	36.5	36.7	36.9	37.1	37.4	37.5	37.6
Female	38	term infant	Others	19	3.75	Ⅲ	No	153	Yes	36.8							35.5	34.8	34.4	34.3	34.5	34.4
Male	38	term infant	Others	25	3.75	Ⅱ	No	125	No				36.8	36.7	36.7	36.6	36.7	36.7	36.7	36.5	36.5	36.9	36.8	36.8
Female	38	term infant	Endoscopic surgery	2	3.79	Ⅲ	Yes	147	No	36.5	36.3	36.3	36.3	36.4	36.4	36.2	36.5	36.5	36.6	36.6	36.5	36.5	36.5	36.5	36.4
Male	37	term infant	Open surgery	1	3.8	Ⅱ	No	195	Yes	36.3	36.4	36.3	36	35.7	35.6	35.6	35.5	35.2	35.2	35.3	35.3	35.3	35.4	35.5	35.4	35.5	35.6	35.8	36
Male	41	term infant	Open surgery	6	3.8	Ⅲ	No	116	Yes	36		35.8	35.6	35.6	35.7	35.8	36	36.1	36.2	36.4
Female	40	term infant	Open surgery	19	3.8	Ⅲ	No	380	Yes	36.4	36.4	36.1	36.1	36	35.8	35.8	35.8	35.9	35.9	35.9	36	36	35.9	35.8	35.9	36	36.1	36.2	36	35.9	35.9	36	36.1	36.2	36.2	35.8	34.6	34.4
Male	37	term infant	Open surgery	12	3.8	Ⅲ	Yes	58	No	36.6	36.7	36.5	36.3	36.3	36.3
Male	39	term infant	Others	2	3.8	Ⅱ	Yes	48	No			36.5	36.5	36.5	36
Female	39	term infant	Others	6	3.83	Ⅲ	No	333	Yes	36.3	36.5	36.5	36.3	36.2	36.3	36.3	36.2	36.2	36.1	36.2	36.1	36.3	35.8	36	35.9	35.6	35.7	35.8	36	36.2	36.3	36.5	36.7	36.8	37	37.1	37.3	37.4
Male	39	term infant	Endoscopic surgery	25	3.84	Ⅲ	No	99	Yes	36.3		35.6	35.5	35.4	35.4	35.5	35.6	35.8	36
Male	39	term infant	Endoscopic surgery	8	3.85	Ⅲ	Yes	176	No	36.8	36.6	36.4	36.3	36.2	36.1	36.1	36.1	36.1	36.1	36.1	36.1	36.1	36.1	36.2	36.2	36.2	36.2	36.2
Female	39	term infant	Others	6	3.85	Ⅲ	No	356	No					36.7	36.7	36.7	36.8	36.7	36.7	36.7	36.8	36.9	36.8	36.8	36.8	36.7	36.6	36.5	36.5	36.5	36.5	36.5	36.5	36.5	36.5	36.5	36.4	36.4	36.5
Female	38	term infant	Open surgery	18	3.85	Ⅲ	No	140	No	36.4	36.7	36.6	36.4	36.3	36.3	36.3	36.2	36.3	36.3	36.4	36.3	36.5	36.3	36.5	36.4	36.3	36.5
Male	38	term infant	Endoscopic surgery	9	3.85	Ⅱ	No	67	Yes	36.5	36.3	36	35.7	35.4	35.1	34.7
Male	40	term infant	Others	1	3.87	Ⅲ	No	79	No		36	36.1	36.1	36	36	36	36
Female	39	term infant	Endoscopic surgery	5	3.87	Ⅱ	No	133	No		36.6	36.8	37.1	36.9	36.8	36.7	36.6	36.5	36.5	36.6	36.6	36.7	36.7
Male	40	term infant	Endoscopic surgery	28	3.9	Ⅱ	No	57	Yes	36.4	35.5	35.3	35.3	35.2	35.1
Male	39	term infant	Others	6	3.9	Ⅲ	No	107	Yes	36.9	36.7	36.6	36.3	36.1	35.7	35.7	35.4	35.5	35.5	35.5	35.2	36	36	36.1	36.1	36.2	36.2	36.3
Male	38	term infant	Endoscopic surgery	27	3.91	Ⅱ	No	72	Yes	36.3	36.2	36.1	35.8	35.9	35.8	35.8
Male	38	term infant	Open surgery	26	3.91	Ⅲ	Yes	116	No					36.8	37	37.1	37	37	36.9	36.8	36.6	36.5
Male	40	term infant	Endoscopic surgery	28	3.95	Ⅲ	No	282	No					36.5	36.6	36.5	36.3	36.3	36.5	36.2	36.4	36.3	36.3	36.3	36.3	36.3	36.5	36.8	36.7	36.1	36.2	36.3	36.3	36.4	36.5	36.6	36	36.2
Male	40	term infant	Others	2	4	Ⅲ	No	290	Yes	36	36.1	35.9	35.7	35.5	35.1	35.2	35	35.1	35.1	35.1	35	35.1	35.1	35.2	35.3	35.3	35.3	35.4	35.4	35.5	35.5	35.5	36	36	36	36	36
Female	40	term infant	Open surgery	13	4	Ⅲ	No	140	No					36.6	36.8	36.7	36.7	36.6	36.5	36.4	36.5	36.4	36.4	36.4
Female	40	term infant	Endoscopic surgery	5	4	Ⅱ	No	139	No	36.1	36.2	36.1	36.1	36.1	36.1	36	36	36	36	36	36.1	36.1	36
Female	40	term infant	Endoscopic surgery	8	4	Ⅲ	No	40	No			36.6	36.5	36.4	36.4	36.4	36.3
Male	38	term infant	Others	7	4.07	Ⅱ	No	99	Yes	36.2		35.8	35.7	35.8	35.8	35.9	35.9	35.8	36.2	36.4	36.6
Female	39	term infant	Others	8	4.1	Ⅲ	No	61	No		36.4	36.4	36.5	36.2	36.2
Male	38	term infant	Endoscopic surgery	27	4.1	Ⅲ	Yes	287	Yes	36.1							36.1	35.7	35.5	35.5	35.5	35.5	35.6	35.9	36.1	36.3	36.2	36.2	36.1	36	35.8	36	36.2	36	35.9	35.9	35.8	35.8
Male	39	term infant	Open surgery	19	4.2	Ⅱ	No	129	Yes	36.2	36.1	35.9	35.5	35.3	35	34.9	35	34.9	35	35.1	35.2	35.3	35.4
Male	38	term infant	Others	22	4.2	Ⅲ	No	109	Yes		36.5	36.3	36.1	36	35.9	36	36	35.9
Male	38	term infant	Open surgery	21	4.2	Ⅱ	No	394	Yes	36		36	36	36	36	36.1	36.1	36.1	36	36	35.8	35.8	35.8	35.8	35.8	35.7	35.8	35.7	35.8	35.7	35.8	35.8	35.8	35.8	35.8	35.8	35.8	35.8
Female	37	term infant	Others	1	4.24	Ⅲ	No	268	Yes	36.3	36.2	36.2	36.2	36.2	36.2	36.2	36.2	36.2	36.2	36.2	36.2	35.6	35.7	36	36.2	36.4	36.6	36.8	37	37.1	37.2	37.3	37.4	37.6
Female	40	term infant	Endoscopic surgery	21	4.3	Ⅱ	No	80	No	36.6				36.2				36.2
Female	40	term infant	Endoscopic surgery	22	4.33	Ⅱ	No	250	Yes	36.3	36.2	36.2	36	35.9	36	36	35.8	35.7	35.6	35.6	35.7	35.7	35.6	35.6	35.6	35.6	35.6	35.6	35.6	35.7	35.8	35.8	35.9	36.1
Female	39	term infant	Others	25	4.35	Ⅱ	No	160	Yes	36.3	36	35.9	35.8	35.9	36	36.1	36.2	36.4	36.5	36.6	36.7	36.8	36.8	36.9	36.8
Male	37	term infant	Others	24	4.4	Ⅱ	No	67	No	36.4	36.4	36.4	36.4	36.3	36.2	36.2
Male	39	term infant	Open surgery	6	4.5	Ⅲ	No	153	No	37	37.2	37.2	37.2	37.3	37.7	37.5	37.4	37.3	37.2	37	36.7	36.3	36.4	36.4	36.3
Female	40	term infant	Endoscopic surgery	1	4.6	Ⅲ	No	150	Yes	36.1	35.9	35.8	35.7	35.7	35.8	35.9	35.9	35.9	35.8	35.8	35.8	35.8
Male	34	premature	Open surgery	6	2.2	Ⅲ	No	145	Yes	36.3	35.8	35.7	35.7	36.3	35.9	36.2	36.1	35.8	36.4	36.4	36.1
Male	34	premature	Open surgery	27	2.8	Ⅲ	No	248	Yes	36.2	36.2	36.1	36.1	36	36	36	35.9	35.9	35.9	36	36	35.9	35.8	36	36	36.1	36.2	36.3	36.5	36.5	36.5	36.6	36.7	36.8
Male	36	premature	Endoscopic surgery	7	3.23	Ⅲ	Yes	180	Yes	36.1				35.5	35.5	35.7	35.7	35.8	35.8	35.9	36	36.1	36.2	36.3	36.2
Male	35	premature	Others	1	2.66	Ⅲ	No	76	Yes	36.6	33.3	32.6	34.5	35	34.9	35.3
Male	39	term infant	Open surgery	1	3.54	Ⅱ	Yes	100	Yes	36.4	36.3	36.2	36.1	36	35.9	35.9	36	36
Male	37	term infant	Others	3	2.3	Ⅲ	Yes	32	No	36.6	36.6	36.6	36.5
Male	36	premature	Endoscopic surgery	1	2.83	Ⅲ	Yes	131	Yes	36.3	36.1	35.6	35.7	35.9	35.9	36	36	36	36.2	36.2	36.2	36.1
Female	37	term infant	Others	1	2.9	Ⅱ	Yes	102	Yes	35.4	35.1	34.8	34.3	34.1	33.9	34.8	35.2	35.8	35.8
Male	38	term infant	Endoscopic surgery	24	4	Ⅲ	No	349	Yes	37.4	37.4	37.4	37.2	37.1	37	37	37	36.9	36.8	36.5	36.2	35.9	35.6	35.6	35.5	35.4	35.3	35.2	35.2	35.2	35.1	35.4	35.6	35.8	36	35.7	36.1	36.3	36.4	36.6	36.6	36.7	36.8	36.9
Male	39	term infant	Open surgery	4	3.8	Ⅲ	No	182	No	36.3	36.3	36.3	36.3	36.3	36.3	36.3	36.3	36.3	36.3	36.3	36.3	36.3	36.3	36.3	36.2	36.2	36.2	36.2
Female	39	term infant	Others	5	2.7	Ⅱ	No	165	Yes	36.5	35.1	35.2	35.1	35	34.9	35.1	35	35	35.1	35.1	35	35	35	35	35	34.9
Female	37	term infant	Others	3	2.68	Ⅱ	No	200	Yes	36			35.5	35.6	35.6	35.5	35.6	35.5	35.5	35.5	35.5	35.5	35.4	35.4	35.4	35.5	35.5	35.8	35.8
Female	35	premature	Endoscopic surgery	3	1.93	Ⅲ	No	241	Yes	36.5		35.4	35.4	35.4	35.4	35.5	35.5	35.6	35.6	35.6	35.7	35.7	35.8	35.8	35.8	35.7	35.8	35.8	35.8	35.8	35.9	35.9	36
Male	36	premature	Open surgery	14	3.1	Ⅱ	No	299	Yes	36	36	36	36	36	36	36	35.9	35.8	35.7	35.8	36.1	36.1	36.1	36.2	36.3	36.4	36.5	36.5	36.5	36.1	36.1	36.5	36.5	36.5	36.5	36.5
Female	38	term infant	Endoscopic surgery	13	3.1	Ⅱ	Yes	81	Yes	35.9	35.8	35.8			35.9	35.9	35.8	36
Female	40	term infant	Endoscopic surgery	2	2.4	Ⅲ	Yes	195	Yes	36	36	35.8	35.8	35.7	35.3	34.6	34.9	34.7	35.1	35.1	35.4	35.5	35.6	35.6	35.6	35.7	35.7	35.7	35.7
Male	40	term infant	Endoscopic surgery	1	4.2	Ⅲ	No	119	Yes	36.1	35.6	36	35.8	35.8	35.7	35.8	35.8	35.8	35.8	35.8
Male	38	term infant	Endoscopic surgery	14	3.6	Ⅲ	No	275	Yes	36.5				36.8		36.9	36.9	36.9	36.9	36.8	36.5	36.3	36.1	36	35.9	35.8	35.6	35.4	35.3	35.4	35.5	35.6	35.7	35.8	36
Male	37	term infant	Endoscopic surgery	17	3.1	Ⅲ	No	523	Yes	36		34.9	34.7	34.7	35	35.2	35.3	35.3	35.4	35.4	35.3	35.2	35	34.8	34.7	34.7	34.7	34.7	34.7	34.7	34.9	35	34.9	34.9	35.4	35.7	35.8	35.8	35.3	35.4	35.4	35.8	35.9	35.8	35.6	35.4	35.5	35.4	35.5
Female	40	term infant	Open surgery	26	3.43	Ⅱ	No	149	No		36.7	36.7	36.7	36.7	36.7	36.7	36.7	36.7	36.8	36.8	36.9	37	37	36.8
Female	39	term infant	Endoscopic surgery	3	2.8	Ⅱ	No	245	Yes	36	35.4	35	34.8	34.6	34	34.5	35	35.8	36.4	36.3	36	35.9	35.8	35.8	35.8	35.8	35.8	35.9	36	36	36	36	36.1
Female	40	term infant	Others	3	3.3	Ⅲ	No	135	Yes	36.3		36	35.6	35.5	35.4	35.4	35.4	35.4	35.4	35.4	35.5	35.5
Female	36	premature	Endoscopic surgery	2	2.2	Ⅲ	Yes	153	Yes	36.3	34	34.6	34.8	35.1	35.6	35.8	35.3	35.8	36.2	35.9	36.4	36.7	36.9	35.9	36.2
Male	36	premature	Endoscopic surgery	1	2.51	Ⅲ	No	135	Yes	35.8	35.5	35.5	35.2	34.8	34.7	34.7	34.6	34.5	34.3	34.4	35.5	35.8
Female	37	term infant	Endoscopic surgery	1	3.2	Ⅱ	No	139	No	36.3	36.3	36.1	36	36.2	36.1	36	36	36	36	36	36	36	36
Male	38	term infant	Endoscopic surgery	1	3	Ⅲ	No	170	Yes	35.6	36	36	36.2	36.3	36.3	36.2	36.1	36.2	36.2	36.3	36.3	36.2	36	36	36	36	36
Male	36	premature	Open surgery	1	2.77	Ⅲ	Yes	232	Yes	36.3	36.1	36	35.6	36	36.2	36.4	35.8	35.4	36.3	36.1	36.6	37.1	35.6	35.8	35.7	36.5	36.1	36	35.9	36	36.2	36	36.1
Male	39	term infant	Open surgery	1	3.15	Ⅲ	Yes	67	Yes	36.3	35.9	36.1	35.9	36.1	36.2	36.5
Female	37	term infant	Endoscopic surgery	1	2	Ⅲ	No	159	Yes	35.5	35.3	35.6	35.2	35.7	36.4	36.7	36.8	35.9	35.7	35.7	35.6	35.6	36	36.8
Female	38	term infant	Others	1	3	Ⅲ	No	150	Yes	36.5	35.5	35.6	35.2	35.4		35.7	35.9	35.9	35.9	35.9	35.9	35.9	35.9	35.8
Male	38	term infant	Others	1	3.48	Ⅲ	No	211	Yes	36.2	35.6	35.6	35.6	35.6	35.8	35.5	35.4	35.3	35.3	35.3	35.2	35.2	35.2	35.1	35.1	35.2	35.2	35.2	35.2	35.2
Male	40	term infant	Endoscopic surgery	3	3.5	Ⅲ	No	163	No		37.1	37.1	37.1	37.1	37.1	37.1	37.3	37.4	37.5	37.6	37.7	37.8	37.9	37.9	37.9	38
Female	35	premature	Endoscopic surgery	3	2.14	Ⅲ	No	151	Yes	36.2		35	34.9	35.1	35.3	35.4	35.6	35.8	35.9	36	36	36.1	35.7	36.6
Female	38	term infant	Endoscopic surgery	3	3.13	Ⅲ	No	184	Yes	36.2				35.4	35.4	35.3	35.4	35.6	35.9	36.1	36.4	36.7	36.9	37.1	37.4	37.6	37.1
Female	38	term infant	Open surgery	28	2.86	Ⅱ	No	209	Yes	36.2	36.2	36.2	36.2	36	36.3	36.4	35.6	35.5	35.3	35.7	35.9	36	36	36	36.1	36.1	36.2	36.1	36.2	36.1
Male	39	term infant	Endoscopic surgery	27	4.2	Ⅱ	No	81	No	36	36	36	36.2	36.2	36.2	36.2	36.2	36.2
Female	38	term infant	Endoscopic surgery	3	2.5	Ⅱ	No	206	No	36.2	36.2	36.1	36	36.2	36.2	36.2	36.2	36.2	36.2	36.2	36.2	36.2	36.2	36.2	36.2	36.2	36.2	36.2	36.2	36.2	36.5
Male	38	term infant	Endoscopic surgery	18	3.73	Ⅲ	No	484	Yes	36.9	37.4	37	36.7	36.6	36.7	36.7	36.8	36.9	36.9	36.9	36.8	36.7	36.5	36.4	36.3	36.2	36	35.9	35.8	35.8	35.8	35.8	35.9	36.1	36.2	36.3	36	36.6	36.6	36.7	36.7	36.7	36.7	36.7	36.7	36.7	36.7	36.6	36.5
Male	35	premature	Open surgery	1	2.8	Ⅲ	Yes	134	Yes	36.6				36.2	36.3	36.2	36.2	35.8	36.1	36	36	36
Female	38	term infant	Others	4	2.98	Ⅱ	No	59	Yes	36.5	35.9	36	35.8	35.6
Male	33	premature	Endoscopic surgery	5	2.25	Ⅲ	Yes	153	Yes	36.1	36.1	36.1	36.1	36.1	36	35.8	35.8	35.8	35.3	35.4	35.5	35.6	35.6	35.3	35.9
Male	33	premature	Endoscopic surgery	1	1.9	Ⅲ	No	172	No	36	36	36	36	36	36	36	36	36	36	36	36	36	36	36.3	36.2	36.3	36.6	37.2
Male	39	term infant	Endoscopic surgery	1	3.59	Ⅲ	No	182	Yes	36.1	35.5	34.9	34.9	34.2	35	35.4	35.6	35.6	35.5	35.5	35.5	35.5	35.5	35.6	35.6	35.7
Male	39	term infant	Endoscopic surgery	2	2.5	Ⅲ	No	95	Yes	36.6	36.3	35	34.9	34.8	34.7	34.5	34.3	35.9
Male	40	term infant	Endoscopic surgery	5	2.69	Ⅳ	No	198	Yes	36.2	36.2	36.2	36.2	36	35.8	35.8	35.7	35.7	35.7	35.6	35.7	35.7	35.7	35.7	35.8	35.8	35.8	35.9
Male	35	premature	Open surgery	6	2.1	Ⅲ	Yes	238	Yes	35.5	35.5	35.5	35.5	35.5	35.5	35.5	35.5	35.5	35.5	35.6	35.8	35.6	35.6	35.6	35.5	35.6	35.7	35.6	35.5	35.4	35.3	35.4	35.5
Male	38	term infant	Endoscopic surgery	3	3.19	Ⅱ	Yes	208	Yes	35.3	36.3	36.3	36.5	36	36	36	36	36	36	36	36	36	36	36	36	35.5	35.3	35.2	34.8
Male	35	premature	Open surgery	3	2.32	Ⅲ	Yes	220	Yes	36	36	36	35.8	35.6	35.9	35.8	35.8	35.9	36.1	35.9	35.8	35.7	35.9	36.1	36.2	36.2	36.2	36.2	36.2	36.3	36.4	36
Female	39	term infant	Endoscopic surgery	1	3.25	Ⅱ	Yes	86	Yes	36.1	36	35.9	35.8	35.7	35.7	35.6	35.6
Male	39	term infant	Others	1	3.02	Ⅱ	Yes	105	Yes	36.3	36	35.9	35.9	35.8	35.7	35.7	35.6	35.5	35.5	35.6
Male	37	term infant	Others	12	2.76	Ⅲ	Yes	110	No			36.3	36.4	36.5	36.5	36.5	36.5	36.6	36.6	36.7
Male	39	term infant	Endoscopic surgery	6	2.88	Ⅲ	Yes	73	No		36.1	36.4	36.5	36.5	36.6	36.7	36.5
Male	38	term infant	Others	2	4.3	Ⅲ	Yes	100	Yes	36	36	35.9	35.8	35.8	35.9	36	36	36.1	36	36
Male	38	term infant	Endoscopic surgery	3	3.04	Ⅲ	No	145	Yes	36.2	34.9	34.8	34.9	34.7	34.5	34.4	34.3	34.4	34.4	34.5	34.6	34.6	34.8	35
Male	39	term infant	Endoscopic surgery	17	2.76	Ⅲ	Yes	184	Yes	36	36	36	35.9	35.9	35.9	35.7	35.6	35.5	35.8	35.8	36.1	36.2	36.3	36.4	36.5	36.4	36.4
Female	40	term infant	Endoscopic surgery	1	3.59	Ⅱ	No	90	No		36.1	36.1	36.1	36	36	36	36	36.1
Male	41	term infant	Endoscopic surgery	1	3.9	Ⅲ	No	136	Yes	36	36.1	35.7	35.8	35.7	36	36	36.1	36.3	36.4	36.5	36.8	36.6
Male	37	term infant	Open surgery	21	3.33	Ⅳ	Yes	241	No	37.2	37.2	37.1	37.1	37	37	36.8	36.8	36.8	36.8	36.8	36.6	36.6	36.6	36.6	36.6	36.6	36.5	36.5	36.5	36.5	36.5	36.5	36.5	36.5
Male	38	term infant	Others	1	3	Ⅱ	Yes	60	Yes	35.8	35.8	35.7	35.8	35.8	35.7
Male	39	term infant	Open surgery	4	2.7	Ⅲ	Yes	213	Yes	36.3	36	36	36	35.9	35.8	35.9	35.9	35.9	35.9	35.9	36	35.9	35.9	35.9	35.9	35.9	35.9	36	36	36
Male	39	term infant	Endoscopic surgery	6	2.56	Ⅲ	Yes	166	Yes	36.5		35	34.9	34.9	34.8	34.8	34.8	34.7	34.7	34.6	34.5	34.7	34.6	34.4	34.5	35
Female	35	premature	Endoscopic surgery	1	1.5	Ⅲ	No	244	No	36.1	36.2	36.3	36.3	36.3	36.3	36.3	36.1	36.1	36.3	36.3	36.3	36.3	36.3	36.3	36.3	36.3	36.3	36.3	36.3	36.3	36.3	36.3	36.3	36.3
Male	36	premature	Endoscopic surgery	1	2.2	Ⅲ	No	156	Yes	36				34.1	34	33.9	34.2	34.6	34.9	35.1	35.3	35.6	35.8	36
Female	38	term infant	Others	6	2.55	Ⅱ	Yes	186	Yes	36	36	36	35.3	35.3	35.3	35.3	35.3	35.3	35.3	35.3	35.3	35.3	35.3	35.3	35.3	35.3	35.5
Male	39	term infant	Endoscopic surgery	2	3	Ⅲ	No	162	Yes	36.3	35.6	35.7	35.9	36	36.1	36.2	36.1	36.1	36.1	36.1	36.1	36	36	36	36
Female	35	premature	Endoscopic surgery	2	2.55	Ⅳ	No	202	Yes	36			35.9	36	35.9	35.7	35.6	35.6	35.4	35.4	35.4	36	36	36	36.2	36.2	36.2	36.2	36.2
Male	40	term infant	Endoscopic surgery	7	2.8	Ⅲ	Yes	125	Yes	36.2		36	35.8	35.6	35.6	35.7	35.7	35.6	35.5	35.5	35.5	35.6
Male	29	premature	Open surgery	5	1.2	Ⅲ	Yes	274	Yes	34	34	34	34	34	34	34	34	34	34	34	34	34	34	34	34	34.1	34.1	34.1	34.2	34.2	34.6	35	35	35.3	35.5	35.8
Female	39	term infant	Open surgery	2	2.95	Ⅲ	No	176	Yes	36.5	36	36.1	36.1	36.2	36.2	36.1	36.1	36	36	35.9	36	36.1	34.1
Male	39	term infant	Open surgery	1	3.15	Ⅲ	Yes	67	Yes	35.9	36.1	35.9	36.1	36.2	36.5
Female	39	term infant	Open surgery	7	2.8	Ⅲ	No	204	Yes	36		35.6	35.6	35.6	35.6	35.6	35.6	35.2	35.3	35.5	35.7	35.8	35.9	36.1	36.2	36.3	36.4	36.6
Male	40	term infant	Endoscopic surgery	13	2.5	Ⅱ	No	90	Yes	36	35.9	35.9	36	35.9	35.9	35.9	35.8	36.1
Male	38	term infant	Others	10	2.8	Ⅱ	No	144	Yes	36.5		36.5	36.2	35.7	35.2	35.3	36.5	36.9	36.6	36.5	36.3	36.3	35.1
Female	39	term infant	Open surgery	9	2.84	Ⅲ	Yes	282	Yes	36.5	36	36	35.5	35.5	35.5	35.5	35.4	35.4	35.5	35.5	35.8	35.9	35.9	36	36	36.1	36.2	36.2	36.2	36.3	36.4	36.6	36.9	36.7
Female	35	premature	Open surgery	1	1.65	Ⅲ	Yes	98	Yes	36		35.5	36	35.7	34.6	34.7	34.7	34.9	35.1
Male	34	premature	Open surgery	2	2.5	Ⅲ	Yes	213	Yes	36.2				34.4	34.8	34.6	34.6	34.6	34.7	34.7	34.8	34.8	34.9	34.8	34.8	35	35.1	35.3	35.4	35.1
Female	39	term infant	Others	6	3.2	Ⅱ	No	190	No		36.3	36.3	36.2	36.2	36.1	36.1	36.1	36.1	36	36	36	36	36	36	36	36	36
Male	39	term infant	Open surgery	1	2.5	Ⅱ	Yes	162	Yes	36.6		36.3	36.4	36.5	36.3	36.1	36	36	35.9	35.9	35.9	35.8	35.9	36	36.3
Male	36	premature	Endoscopic surgery	5	3.23	Ⅲ	No	67	Yes	35	35	35	35	35	35
Male	37	term infant	Endoscopic surgery	13	2.3	Ⅱ	No	103	Yes	36.5		35.6	35.4	35.3	35.3	35.2	35.1
Female	40	term infant	Endoscopic surgery	4	2.8	Ⅲ	No	99	Yes	36.2		36.1	35.9	35.8	35.8	35.6	35.6	35.6	35.5
Male	37	term infant	Others	10	3.46	Ⅳ	No	374	Yes	35.8	35.9	35.7	35.7	35.4	35.6	35	35.8	35.3	35.4	35.5	35.8	35.5	35	35	35.9	35	35	34.9	35	35	35	34.9	34.9	35	35	34.5	34.7	34.6	34.5	34.5	35	35.1	35.6	35.5	35	34.6
Female	32	premature	Endoscopic surgery	1	2.15	Ⅲ	Yes	204	Yes	33.4	33.2	33.2	33.4	33.6	33.6	34.2	34.5	34.6	34.8	34.8	34.8	34.8	34.8	34.8	35	35.2	35.4	35.4	35.6	36.1
Male	37	term infant	Open surgery	3	2.39	Ⅲ	Yes	102	Yes	35.8	35.9	35.9	35.8	35.8	35.9	35.9	35.9	35.9	36
Female	39	term infant	Open surgery	6	2.6	Ⅲ	No	169	Yes	36.1	35.8	35.6	35.3	35.6	35.7	35.8	35.9	36	36.2	36.4	36.5	36.4	36.3	36.6	36.8
Male	38	term infant	Others	15	4.2	Ⅲ	No	115	No	36.1	36.1	36.1	36.1	36.1	36.1	36.1	36.2	36.2	36.2	36.2	36.2
Male	37	term infant	Open surgery	2	2.9	Ⅲ	Yes	199	Yes	36				34.7	34.8	35	35	35.1	35.3	35.3	35.3	35.3	35.2	35	35.1	35.3	35.4	35.5	35.5
Male	40	term infant	Endoscopic surgery	2	3	Ⅱ	Yes	98	Yes	36	36	35.7	35.7	35.7	35.8	35.7	33.9	33.9
Female	34	premature	Open surgery	3	2.18	Ⅲ	Yes	184	No	36	36	36	36	36	36	36	36	36	36	36.1	36.1	36.1	36.1	36.1	36.1	36.2	36.2	36.2	36.3
Female	35	premature	Open surgery	1	2.94	Ⅱ	Yes	182	Yes	36.1	36.1	36.2	36.1	36.1	36.1	36.1	36.1	34.8	34.9	34.9	35.2	35.3	35.8	35.8	35.8	36	35.9
Female	33	premature	Open surgery	12	1.84	Ⅳ	Yes	230	Yes	34.4	34.6	34.7	34.7	34.7	34.5	34.4	34.6	34.7	34.8	34.8	34.7	34.7	34.7	34.6	34.6	34.7	34.5	34.6	34.7	34.3
Female	40	term infant	Open surgery	14	3	Ⅱ	Yes	164	No		36.5	36.6	36.9	37	37.1	37.1	37.1	37	36.8	36.7	36.5	36.5	36.5	36.4	36.4	36.4
Male	36	premature	Endoscopic surgery	1	2.9	Ⅱ	Yes	220	Yes	36.5	36	35.9	35.9	35.9	35.9	35.7	35.8	35.8	35.9	35.9	35.9	35.9	36	36	36.1	36.2	36.4	36.4	36.5	36.4
Male	33	premature	Open surgery	1	2.1	Ⅱ	No	239	Yes	36	35.8	35.4	35.4	36	35	35	34.6	34	33.9	33.9	34	34	34.1	34.2	34.2	34.2	34.2	34.2	34.8	35.1	35.5	35.8	36.1
Male	33	premature	Open surgery	2	2.7	Ⅳ	Yes	139	Yes	34.8	35	35.3	35.4	35.4	35.5	35.5	35.4	35.4	35.5	35.5	35.6	35.6	34.9
Male	40	term infant	Endoscopic surgery	2	3.41	Ⅱ	No	149	Yes	34.5	36.1	36	36.1	36.1	36	36.1	35.9	36	36.1	36.1	36.1	36.1	36.2
Male	39	term infant	Open surgery	6	2.64	Ⅲ	No	213	Yes	36.6		35.3	35	35.2	35.5	35.8	36	36	36	36.2	36.3	36.4	36.2	36.1	36.2	36.3	36.5	36.7	36.8	36.9
Male	36	premature	Endoscopic surgery	24	3.04	Ⅱ	Yes	82	No	36.1	36	36	36	36	36	36	36	36
Male	38	term infant	Open surgery	1	2.9	Ⅲ	Yes	133	No		36.3	36.3	36.2	36	36.2	36.2	36.2	36.2	36.2	36.2	36.2	36.2	36.2
Female	39	term infant	Open surgery	7	3.65	Ⅲ	Yes	202	Yes	36	35.8	35.5	35.3	35	35	35.1	35.5	35.6	35.7	35.9	36.1	36.2	36.3	36.5	36.7	36.8	37	37	37
Male	40	term infant	Endoscopic surgery	8	2.7	Ⅲ	Yes	153	Yes	36.2		36	35.8	35.7	35.8	35.8	35.6	35.5	35.4	35.4	35.3	35.2	35.2	35
Female	40	term infant	Endoscopic surgery	9	2.9	Ⅲ	Yes	90	No	36.3	36.3	36.5	36.3	36	36.1	36.1	36.1	36.1
Female	36	premature	Endoscopic surgery	3	2.37	Ⅱ	No	150	No	36.2	36.2	36.1	36.1	36.1	36.1	36.1	36.1	36.1	36.1	36.2	36.2	36.2	36.2
Female	37	term infant	Endoscopic surgery	1	2.82	Ⅲ	Yes	98	Yes	35.1	35.1	35.2	35.3	35.6	35.8	36	36.2	36.5	36.5
Female	35	premature	Open surgery	1	1.65	Ⅲ	Yes	98	Yes	36		35.5	36	35.7	34.6	34.7	34.7	34.9	35.1
Male	34	premature	Open surgery	1	2.76	Ⅲ	No	123	Yes	35.3	35.3	35.3	35.3	35.3	35.3	35.3	35.3	35.3	35.3	35.3	35.5
Female	39	term infant	Open surgery	1	3.5	Ⅱ	Yes	200	Yes	36	36		35.9	35.8	35.9	35.7	35.6	35.5	35.4	35.4	35.5	35.5	35.5	35.6	35.7	35.8	35.9	36	36
Male	40	term infant	Open surgery	2	3.36	Ⅲ	No	230	Yes	36.2		36.2	36.2	36	35.9	35.9	35.8	35.8	35.7	35.5	35.4	35.3	35.3	35.5	35.4	35.4	35.4	35.4	35.5	35.4	35.9
Male	39	term infant	Open surgery	1	3.04	Ⅱ	Yes	60	No		36.1	36	36	36
Male	39	term infant	Others	1	3.26	Ⅲ	Yes	91	Yes	35.3	35.3	35.4	35.6	35.7	35.7	35.8	35.9	36.1
Male	29	premature	Open surgery	5	1.32	Ⅲ	Yes	196	Yes	34.2	33.6	33.9	34.5	34.3	34.1	34.4	34.4	34.5	34.5	33.8	33.9	33.8	33.9	34.1	34.3	34.4	34.5	34.7	35.6	36.2
Female	40	term infant	Endoscopic surgery	3	3.25	Ⅲ	Yes	153	Yes	35.8		35.7	35.8	35.4	35.5	35	35.3	35.3	35.3	35.4	35.6	35.8	35.6	35.8
Male	40	term infant	Open surgery	1	3.29	Ⅲ	No	88	Yes	36.1	35.1	35.1	35	34.9	34.8	34.7	34.6
Male	38	term infant	Open surgery	2	3.2	Ⅲ	No	224	Yes	36.2	35.7	35.7	35.4	35.1	35	35	35	35	35	35	34.9	34.8	34.7	34.6	34.5	34.3	34.1	34.1	33.8	33.8
Female	39	term infant	Endoscopic surgery	7	2.3	Ⅲ	Yes	111	Yes	36.9	36.1	36.7	36.8	35.8	36.3	36.3	36.3	36.3	36.3	36.3
Female	38	term infant	Endoscopic surgery	4	2.38	Ⅲ	No	194	Yes	36.3				34.8	35.1	35	35	35.1	35.2	35.2	35.2	35.3	35.4	35.5	35.5	35.6
Female	36	premature	Endoscopic surgery	4	1.62	Ⅲ	Yes	146	Yes	35.8	34.3	35.3	35.2	35.2	35.2	35.2	35.2	35.2	35.2	35.2	35.3	35.4	35.4
Female	38	term infant	Open surgery	10	3	Ⅲ	No	134	Yes	36.5					34.6	34.6	34.8	35	35.2	35.6	36.1	36.1
Female	40	term infant	Open surgery	3	3.42	Ⅲ	No	124	Yes	34.8	34.8	35.1	35	35	34.9	34.9	34.9	34.9	34.9	34.9	34.4
Male	37	term infant	Endoscopic surgery	1	2.54	Ⅲ	No	184	Yes	36	35	35.2	34.8	35.1	35.3	35.5	35.5	35.3	35.6	35.6	35.6	35.6	35.6	35.6	35.6	35.6	35.6
Female	39	term infant	Others	3	2.78	Ⅲ	No	172	Yes	36.7	36	36.4	36.2	36	35.1	35.3	35.4	35.5	35.6	35.6	35.6	35.6	35.7	35.7	35.8	35.7
Male	40	term infant	Open surgery	15	3.53	Ⅱ	Yes	121	Yes	36.5	36.2	36.2	36.1	35.9	35.8	35.7	35.7	35.7	35.5
Male	40	term infant	Endoscopic surgery	11	3.17	Ⅱ	No	98	Yes	36.3	35.6	35.2	34.9	34.7	34.5	34.4	34.1	32.8	33.9
Male	39	term infant	Others	3	2.7	Ⅱ	No	54	Yes	35.6	35.5	35.2	35.4	35.5	35.7
Female	37	term infant	Endoscopic surgery	1	3.63	Ⅲ	Yes	293	Yes	36.1	36.1	35.8	35.8	35.6	35.8	34.9	34.8	35.2	35.3	35.3	35.2	35.2	35.3	35.3	35.3	35.4	35.4	35.5	35.5	35.5	35.6	35.7	35.8	35.9	36	36	36	35.5
Male	39	term infant	Endoscopic surgery	2	2.38	Ⅲ	No	215	No													36.1	36.2	36.3	36.4	36.4	36.6	36.8	37
Male	40	term infant	Others	1	2.52	Ⅲ	Yes	91	Yes	36.1	35.7	35.8	36	36.2	36.2	36.3	36.5	36.6
Female	32	premature	Open surgery	14	1.72	Ⅲ	No	164	Yes	36.2	36.1	36	35.8	35.6	35.5	35.6	35.5	35.5	35.5	35.4	35.5	35.5	35.4	35.3	35.3	35.4
Male	36	premature	Others	1	2.8	Ⅲ	Yes	82	Yes	35.5	35.5	35.5	35.5	35.4	35.5	35.6	35.8
Male	35	premature	Open surgery	7	2.4	Ⅲ	Yes	236	Yes	35.3	35.1	35	35	34.8	34.6	34.7	34.7	34.7	34.7	34.6	34.6	34.5	34.5	34.3	34.2	34.1	34.3	34.3	34.4	34.5	34.6	34.8	35.1
Male	37	term infant	Endoscopic surgery	8	2	Ⅲ	No	97	Yes	36.2	36	35.7	35.5	35.5	35.7	35.8	35.7	35.8
Male	39	term infant	Others	4	2.8	Ⅲ	No	102	Yes	36	35.4	35.5	35.4	35.3	35.3	35.4	35.5	35.6	35.6
Male	40	term infant	Others	2	3.25	Ⅲ	No	69	No		36.1	36.1	36	36	36	36
[truncated: 24 more columns]
